# Supplementary material
Source: publisher figshare collection journal article supplement (https://acs.figshare.com/ndownloader/files/3859324)
Supplement: Supplementary file 1 [file 3859324]

**Supporting information**

**for**

**[Re(CO)<sub>3</sub>]<sup>+</sup> complexes of exo-functionalized tridentate “click”**

**macrocycles: Synthesis, stability, photophysical properties, bio-**

**conjugation and antibacterial activity**

*Asif Noor,<sup>a</sup> Gregory S. Huff,<sup>a,b</sup> Sreedhar V. Kumar,<sup>a,c</sup> James E. M. Lewis,<sup>a</sup> Brett M. Paterson,<sup>d</sup> Christine Schieber,<sup>d</sup> Paul S. Donnelly,<sup>d</sup> Heather J. L. Brooks,<sup>c</sup> Keith C. Gordon,<sup>a,b</sup> Stephen C. Moratti,<sup>a,b</sup> and James D. Crowley,<sup>a,\*</sup>*

<sup>a</sup>Department of Chemistry, University of Otago, PO Box 56, Dunedin, New Zealand.

<sup>b</sup>MacDiarmid Institute for Advanced Materials and Nanotechnology, New Zealand.

<sup>c</sup>Department of Microbiology and Immunology, Otago School of Medical Sciences, University of Otago, Dunedin, New Zealand.

<sup>d</sup>School of Chemistry and Bio21 Molecular Science Biotechnology Institute, University of Melbourne, Melbourne 3010, Australia.

E-mail: [jcrowley@chemistry.otago.ac.nz](mailto:jcrowley@chemistry.otago.ac.nz)

Fax: +64 3 479 7906; Tel: +64 3 479 7731.

KEYWORDS: macrocycles, CuAAC, click, Re(I), 1,2,3-triazole, pyridyl.

## Contents

|     |                                                                                    |    |
|-----|------------------------------------------------------------------------------------|----|
| 1   | Selected $^1\text{H}$ NMR and HR-ESI-MS spectra of synthesized compounds .....     | 3  |
| 2   | Selected stacked $^1\text{H}$ NMR spectra of the ligands and metal complexes ..... | 18 |
| 3   | Stability and Re(I) labelling experiments .....                                    | 20 |
| 3.1 | Temperature Stability.....                                                         | 20 |
| 3.2 | Histidine competition experiments .....                                            | 21 |
| 3.3 | Labelling experiment of <b>7-Re</b> .....                                          | 23 |
| 4   | Biological Study.....                                                              | 25 |
| 5   | Photo Physical Properties and Density Functional Theory Calculations .....         | 26 |
| 6   | X-Ray data collection and refinement .....                                         | 28 |
| 6.1 | Macrocycle ( <b>7</b> ) .....                                                      | 28 |
| 6.2 | Re(I) complex of macrocycle ( <b>7-Re</b> ) .....                                  | 28 |
| 6.3 | Re(I) complex of macrocycle ( <b>Re-10a</b> ) .....                                | 28 |
| 6.4 | Structure Refinement Data.....                                                     | 29 |
| 7   | References.....                                                                    | 33 |

## 1 Selected $^1\text{H}$ NMR and HR-ESI-MS spectra of synthesized compounds

### Macrocycle, 7

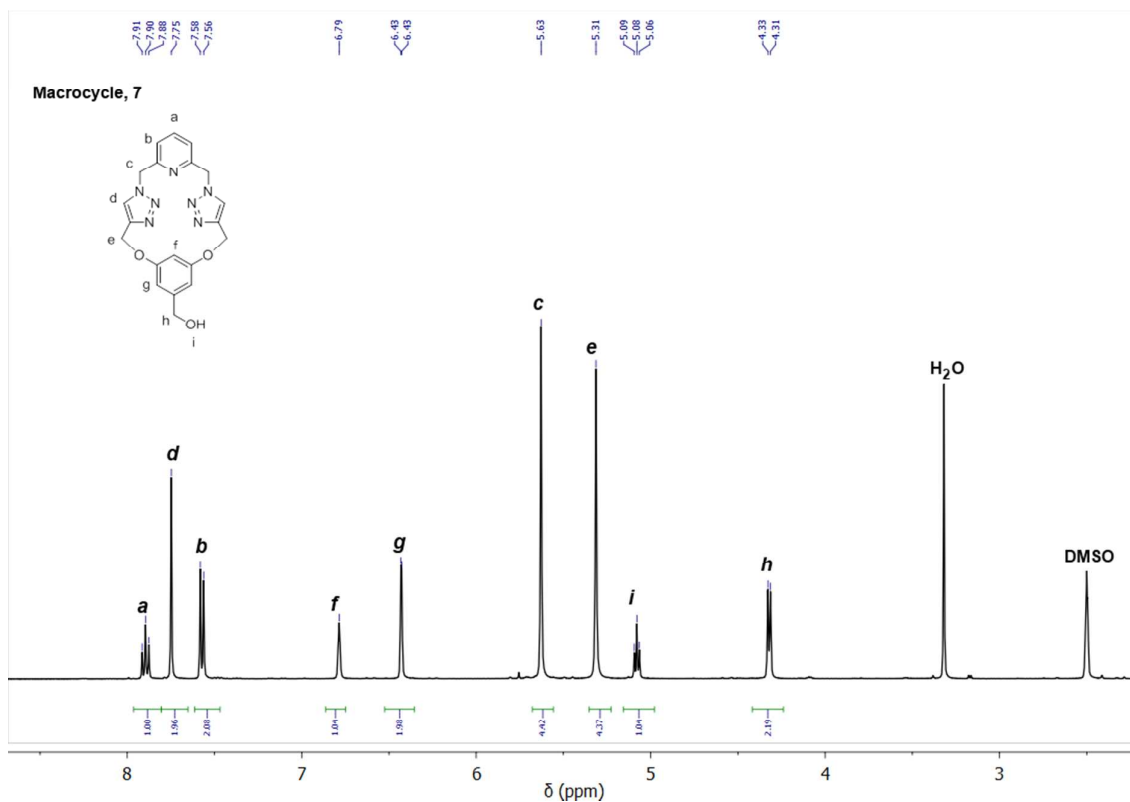

Figure S 1  $^1\text{H}$  NMR spectrum (400 MHz,  $\text{DMSO}-d_6$ , 298 K) of macrocycle 7

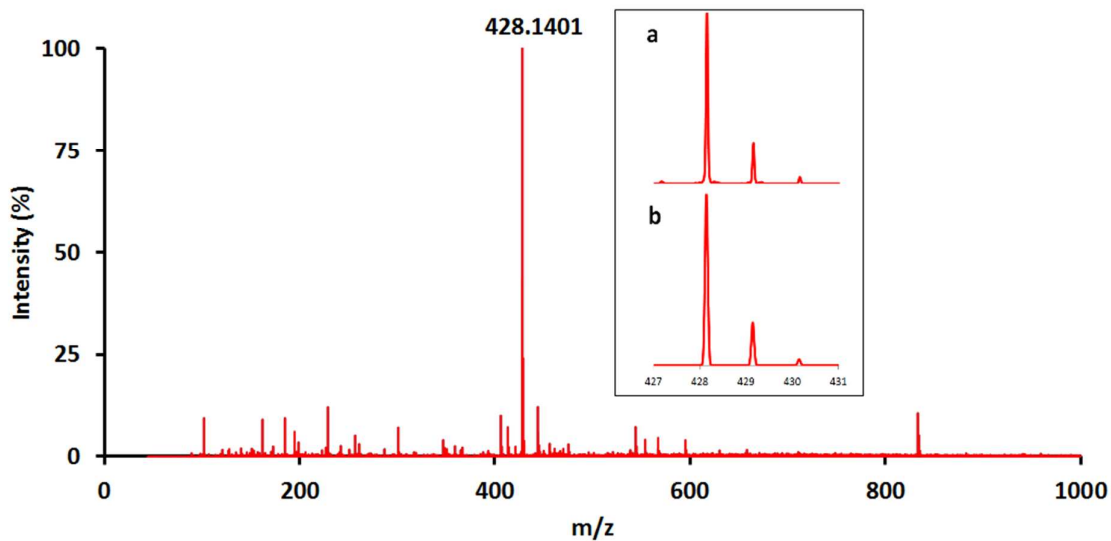

Figure S 2 HR-ESI-MS spectrum of macrocycle 7, inset a) observed and b) calculated isotopic patterns for the peaks at  $m/z = 428.1404$  due to  $[7+\text{Na}]^+$  ion.

## Macrocycle, 8

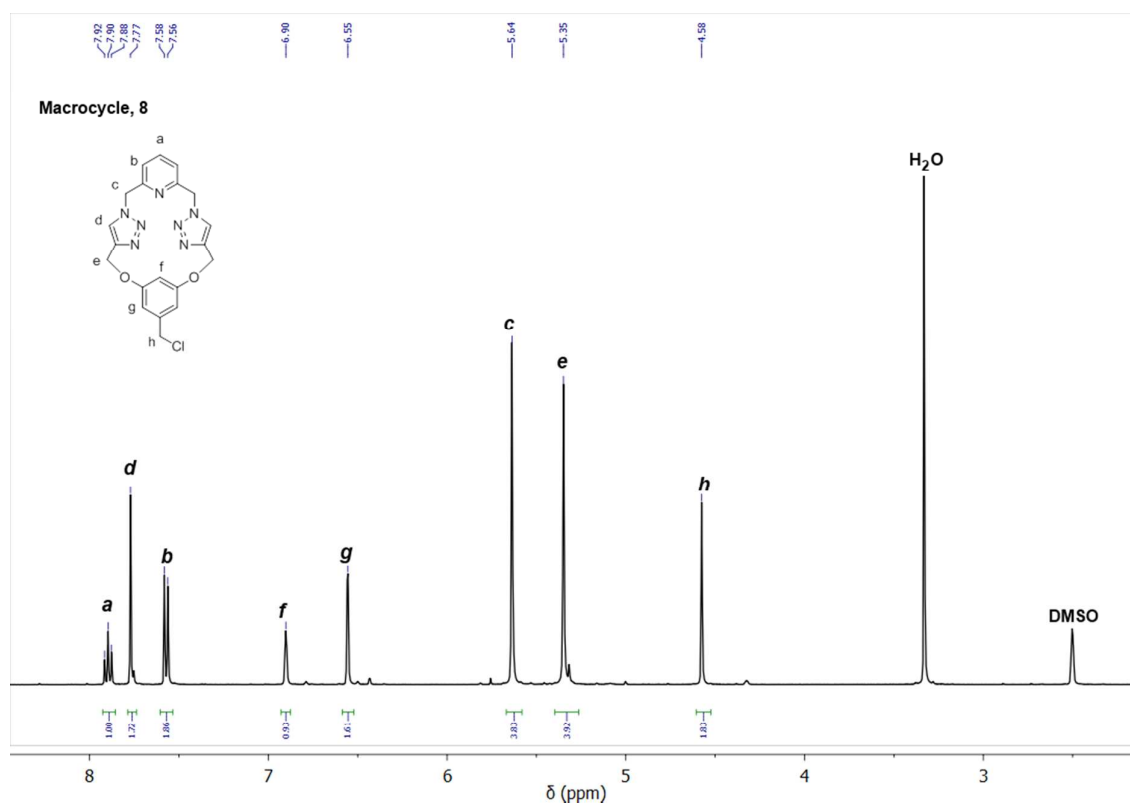

**Figure S 3**  $^1\text{H}$  NMR spectrum (400 MHz,  $\text{DMSO}-d_6$ , 298 K) of macrocycle **8**

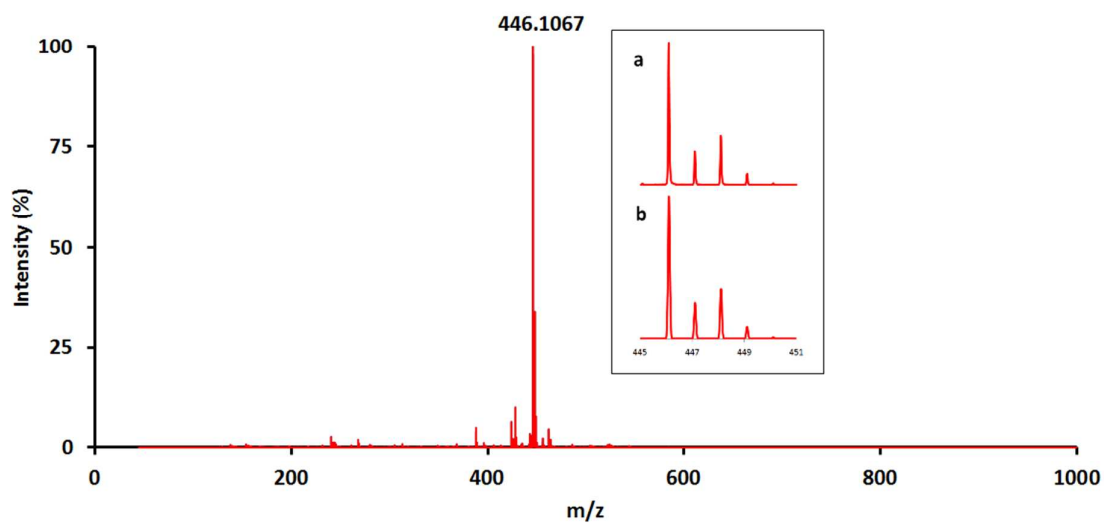

**Figure S 4** HR-ESI-MS spectrum of macrocycle **8**, inset a) observed and b) calculated isotopic patterns for the peak at  $m/z = 446.1067$  due to  $[\mathbf{8}+\text{Na}]^+$  ion.

## Macrocycle, 9

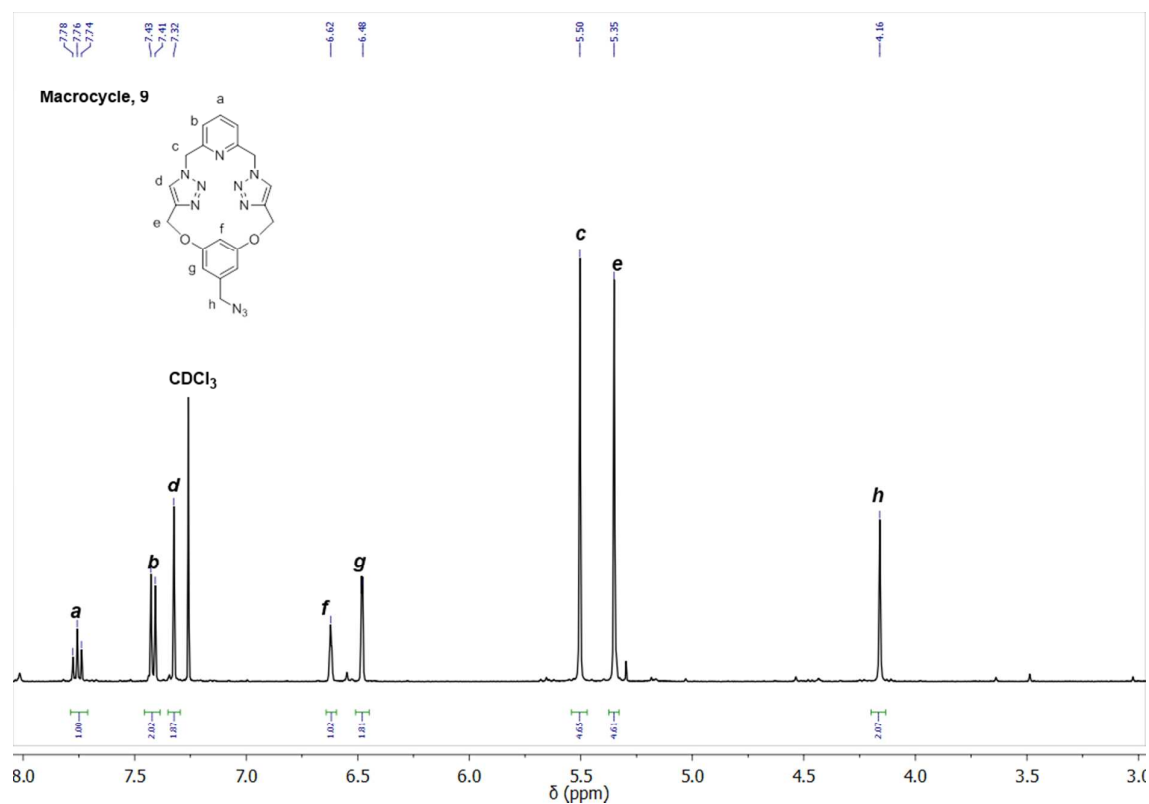

**Figure S 5** <sup>1</sup>H NMR spectrum (400 MHz, CDCl<sub>3</sub>, 298 K) of macrocycle 9

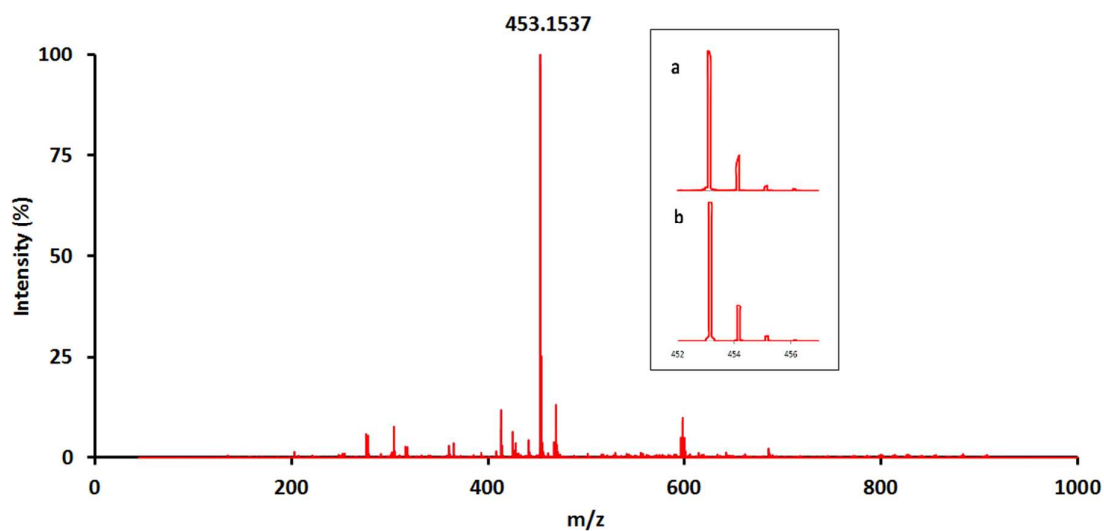

**Figure S 6** HR-ESI-MS spectrum of macrocycle 9, inset a) observed and b) calculated isotopic patterns for the peak at  $m/z = 453.1537$  due to  $[9+Na]^+$  ion.

## Acid functionalized macrocycle, 10a

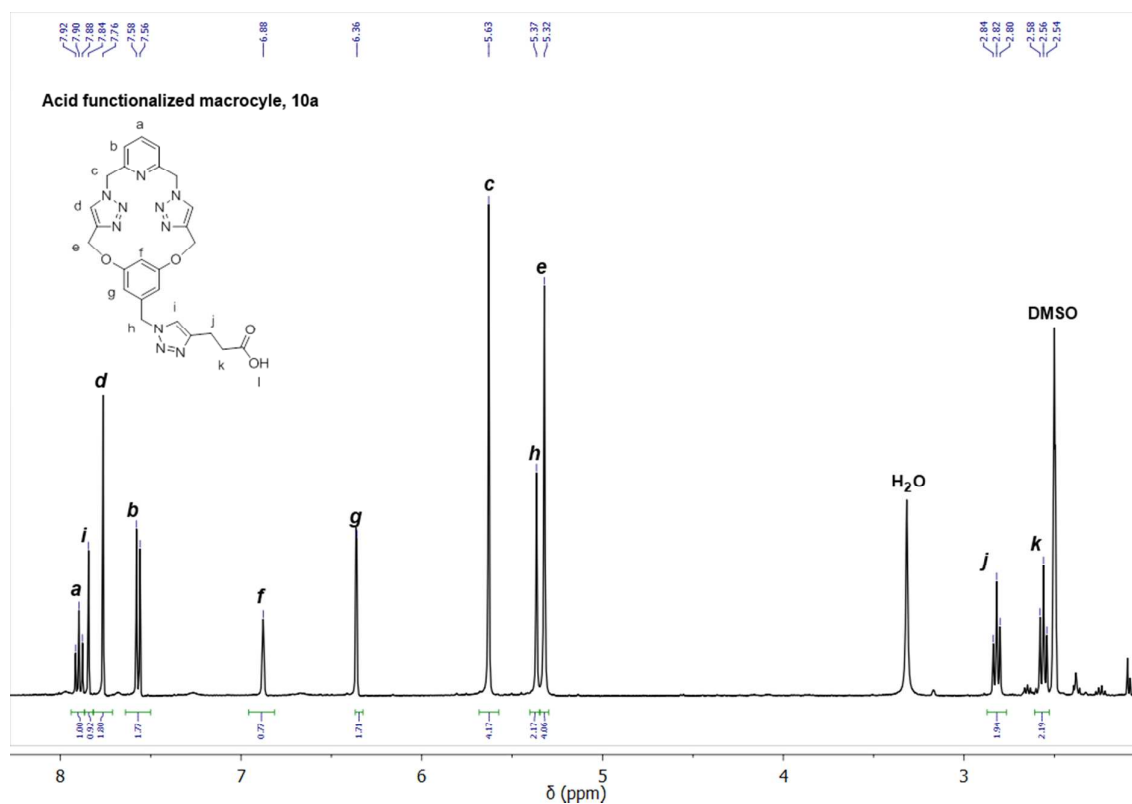

**Figure S 7**  $^1\text{H}$  NMR spectrum (400 MHz,  $\text{DMSO}-d_6$ , 298 K) of macrocycle **10a**

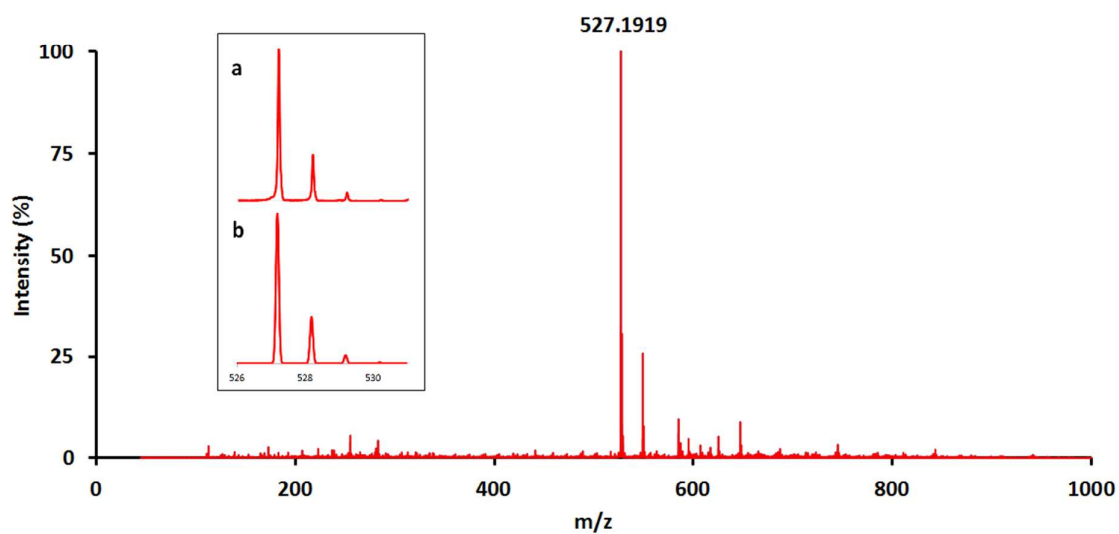

**Figure S 8** HR-ESI-MS spectrum of macrocycle **10a**, inset a) observed and b) calculated isotopic patterns for the peak at  $m/z = 527.1919$  due to  $[\mathbf{10a-H}]^-$  ion.

## NHS activated ester functionalized macrocycle, 10b

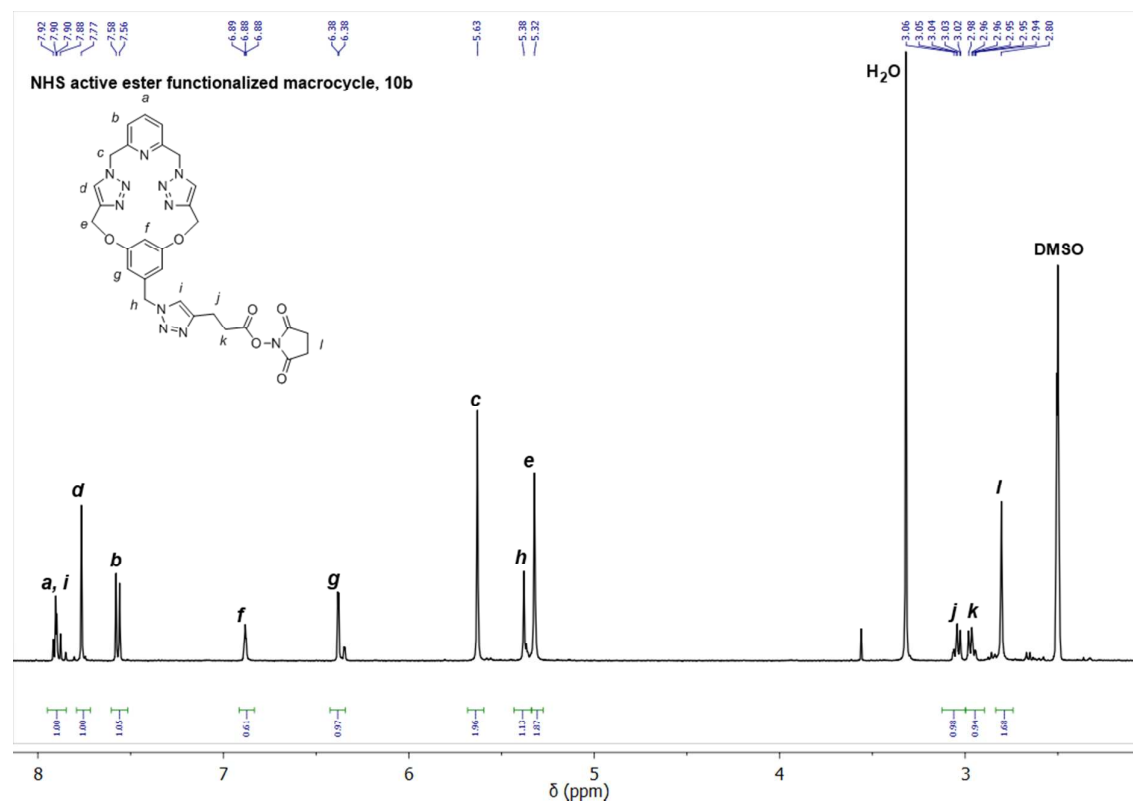

**Figure S 9** <sup>1</sup>H NMR spectrum (400 MHz, DMSO-*d*<sub>6</sub>, 298 K) of macrocycle **10b**.

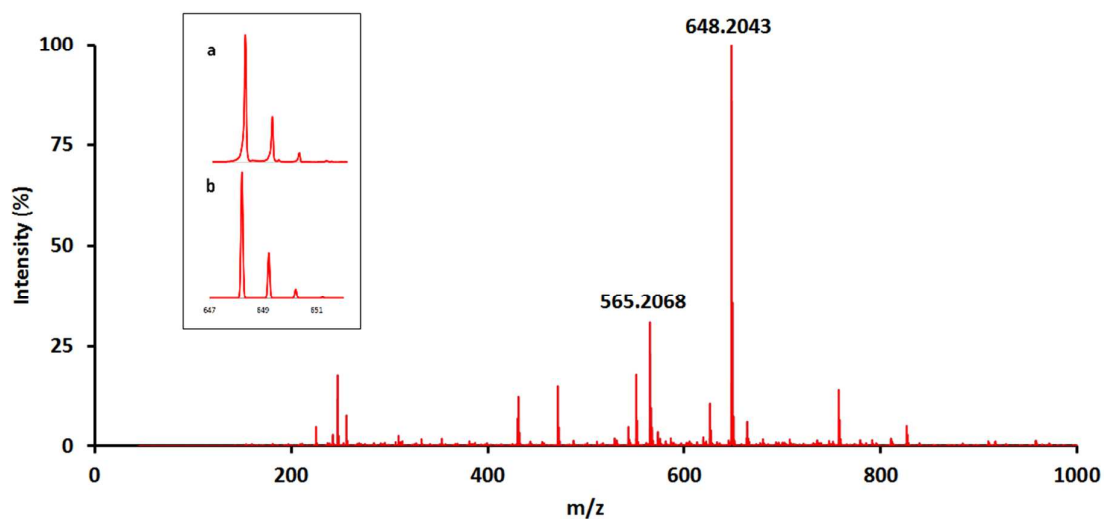

**Figure S 10** HR-ESI-MS spectrum of macrocycle **10b**, inset a) observed and b) calculated isotopic patterns for the peak at  $m/z$  = 648.2043 due to [**10b**+Na]<sup>+</sup> ion, also showing peak due to [**10b**-NHS+CH<sub>3</sub>+Na]<sup>+</sup> at  $m/z$  = 565.2068.

## Gluco-conjugated macrocycle 10c

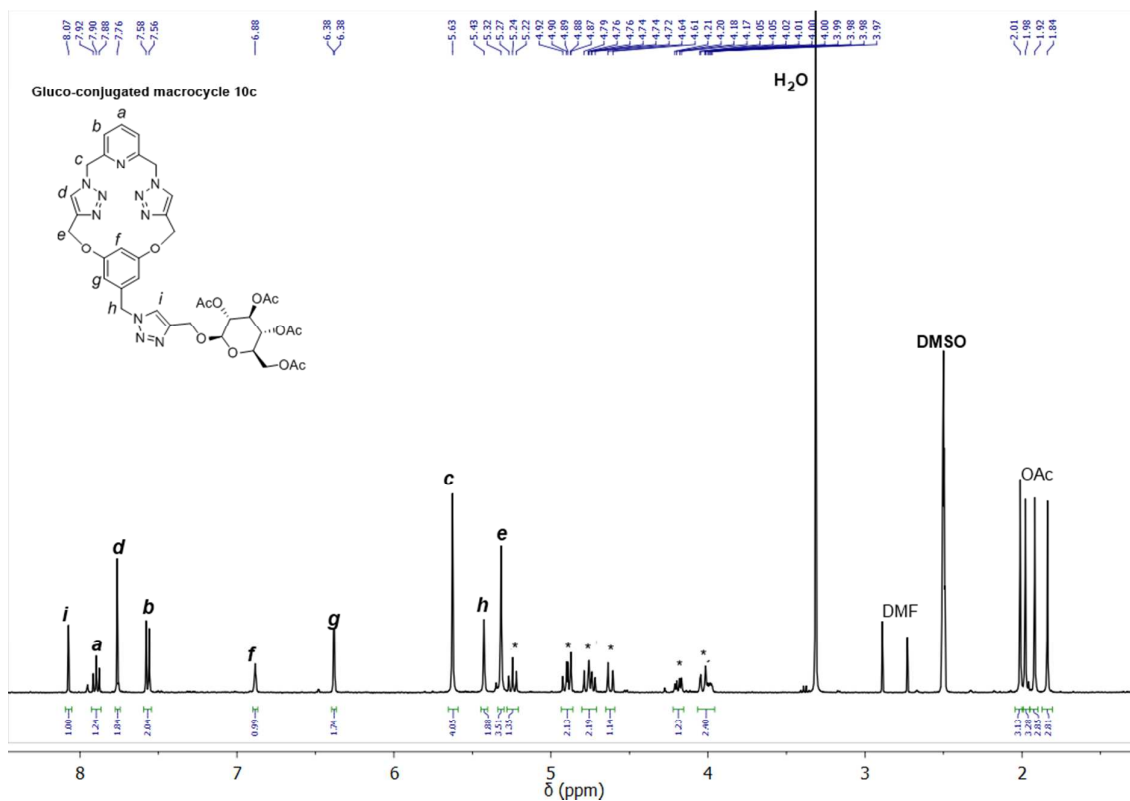

**Figure S 11**  $^1\text{H}$  NMR spectrum (400 MHz,  $\text{DMSO-}d_6$ , 298 K) of macrocycle **10c** (\* peaks from sugar molecule).

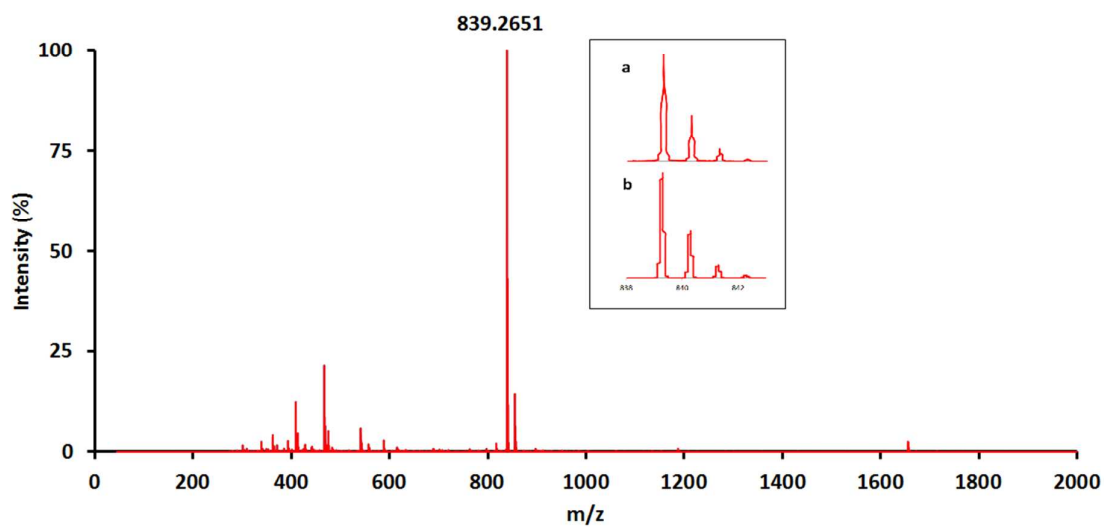

**Figure S 12** HR-ESI-MS spectrum of macrocycle **10c**, inset a) observed and b) calculated isotopic patterns for the peak at  $m/z = 839.2651$  due to  $[\mathbf{10c}+\text{Na}]^+$  ion.

## Gluco-conjugated macrocycle 10d

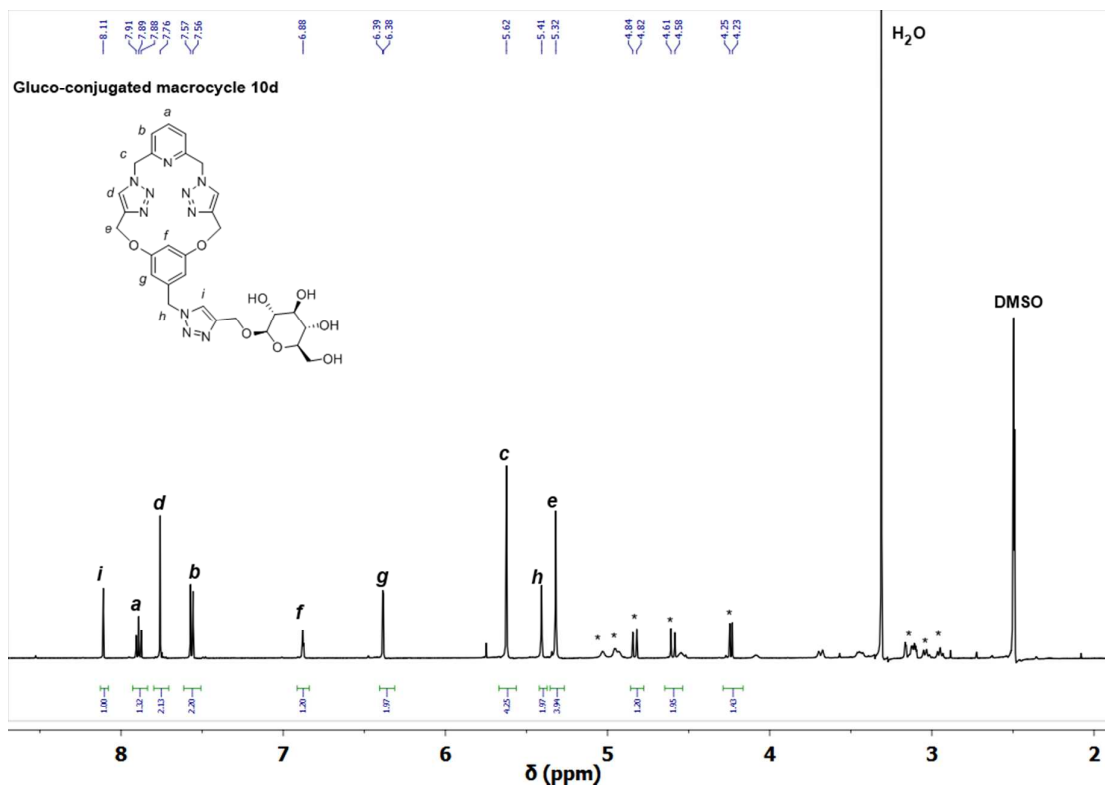

**Figure S 13** <sup>1</sup>H NMR spectrum (500 MHz, DMSO-*d*<sub>6</sub>, 298 K) of macrocycle **10d** (\* peaks from sugar molecule).

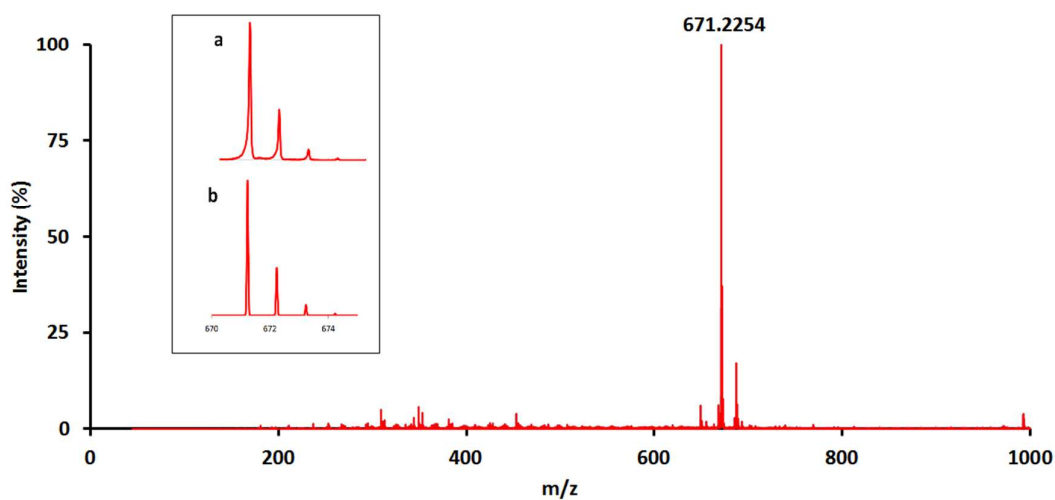

**Figure S 14** HR-ESI-MS spectrum of macrocycle **10d**, inset a) observed and b) calculated isotopic patterns for the peak at  $m/z$  = 671.2254 due to  $[\mathbf{10d}+\text{Na}]^+$  ion.

## Steroid-conjugated macrocycle 10e

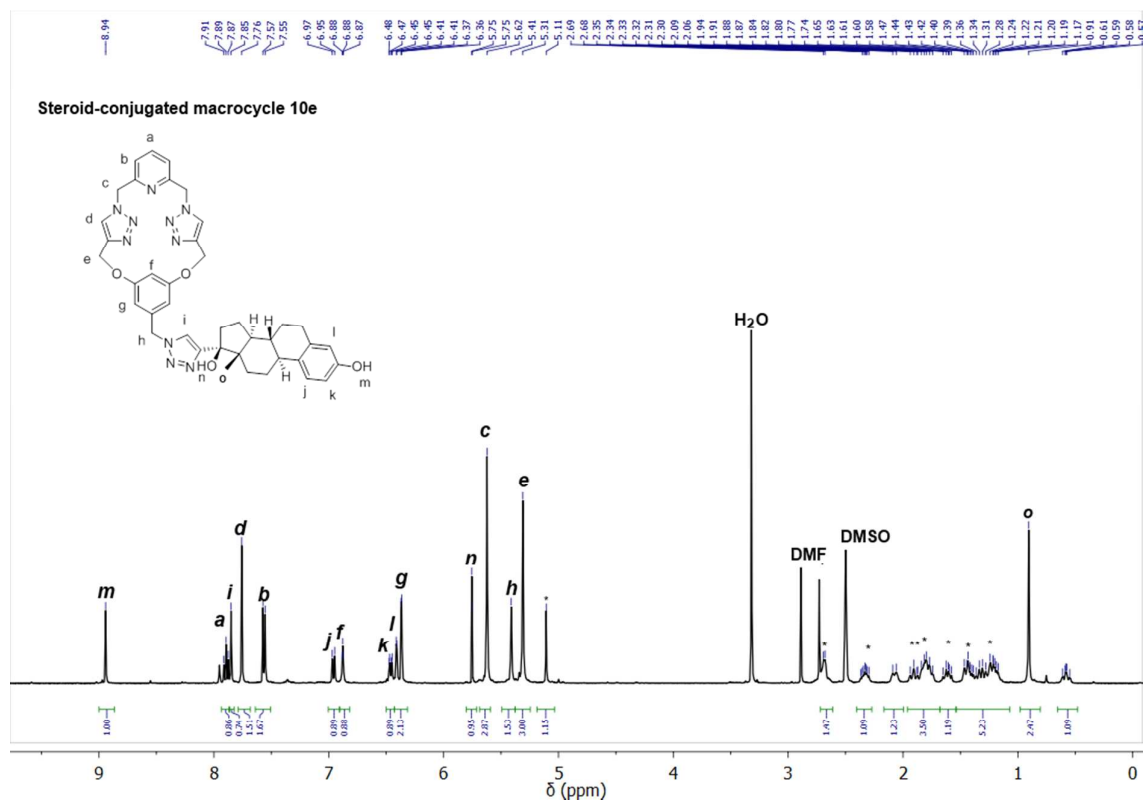

**Figure S 15**  $^1\text{H}$  NMR spectrum (400 MHz,  $\text{DMSO}-d_6$ , 298 K) of macrocycle **10e** (\* peaks from steroid molecule).

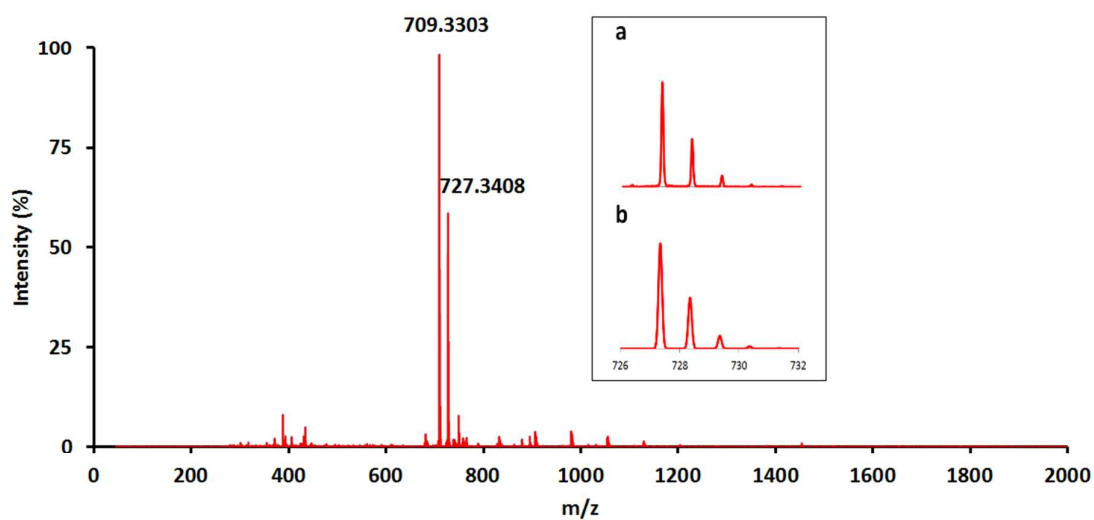

**Figure S 16** HR-ESI-MS spectrum of macrocycle **10e**, inset a) observed and b) calculated isotopic patterns for the peak at  $m/z = 727.3408$  due to  $[\mathbf{10e}+\text{H}]^+$  ion.

**[Re(CO)<sub>3</sub>(7)]Br, (7-Re)**

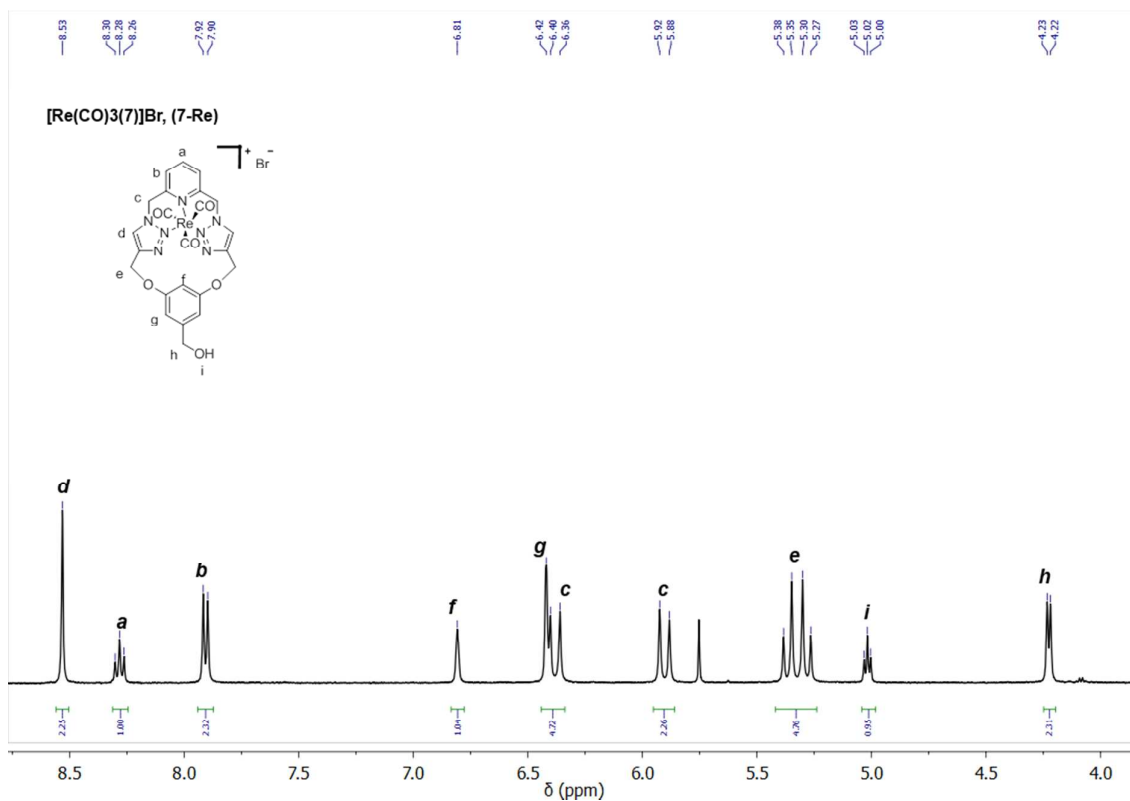

**Figure S 17** <sup>1</sup>H NMR spectrum (400 MHz, DMSO-*d*<sub>6</sub>, 298 K) of macrocycle **7-Re**.

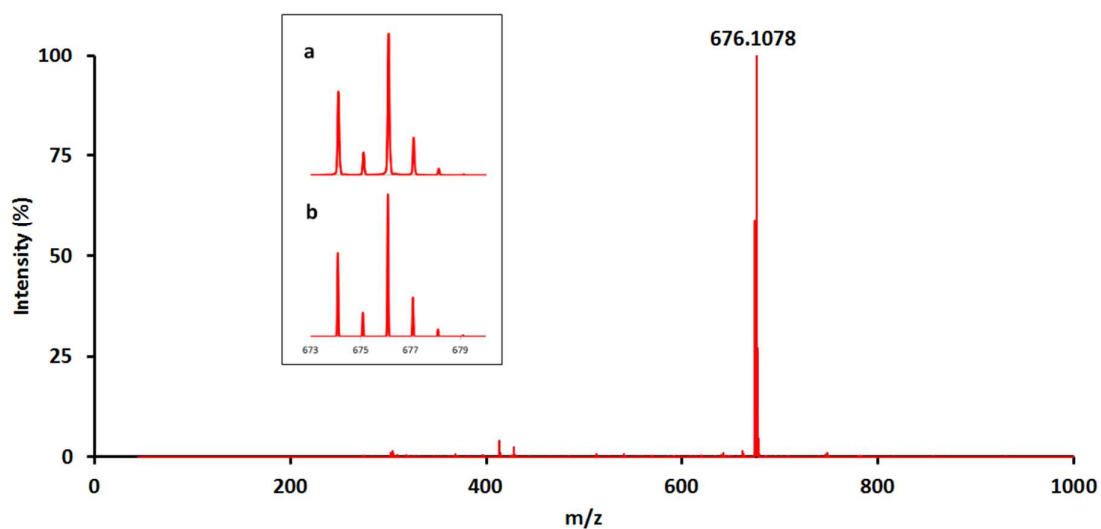

**Figure S 18** HR-ESI-MS spectrum of macrocycle **7-Re**, inset a) observed and b) calculated isotopic patterns for the peak at  $m/z$  = 676.1078 due to  $[\text{Re}(\text{CO})_3+7]^+$  ion.

**[Re(CO)<sub>3</sub>(10a)]Br, (Re-10a)**

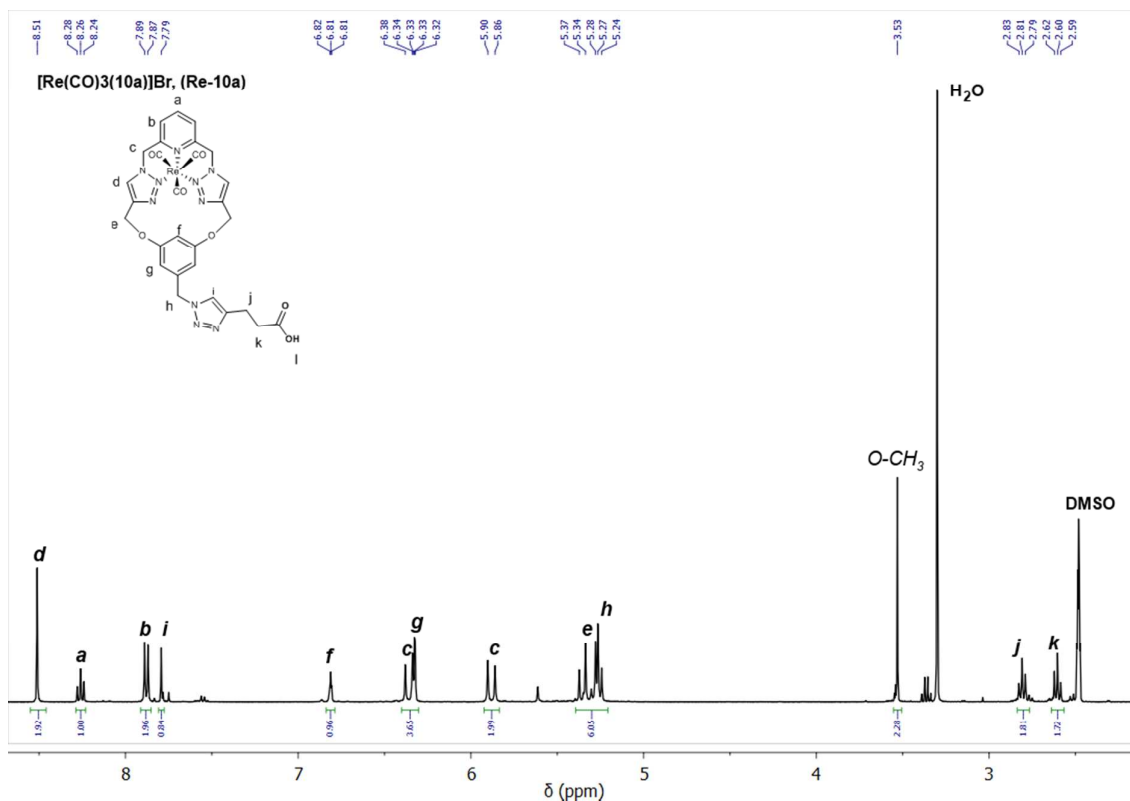

**Figure S 19** <sup>1</sup>H NMR spectrum (400 MHz, DMSO-*d*<sub>6</sub>, 298 K) of macrocycle **Re-10a**

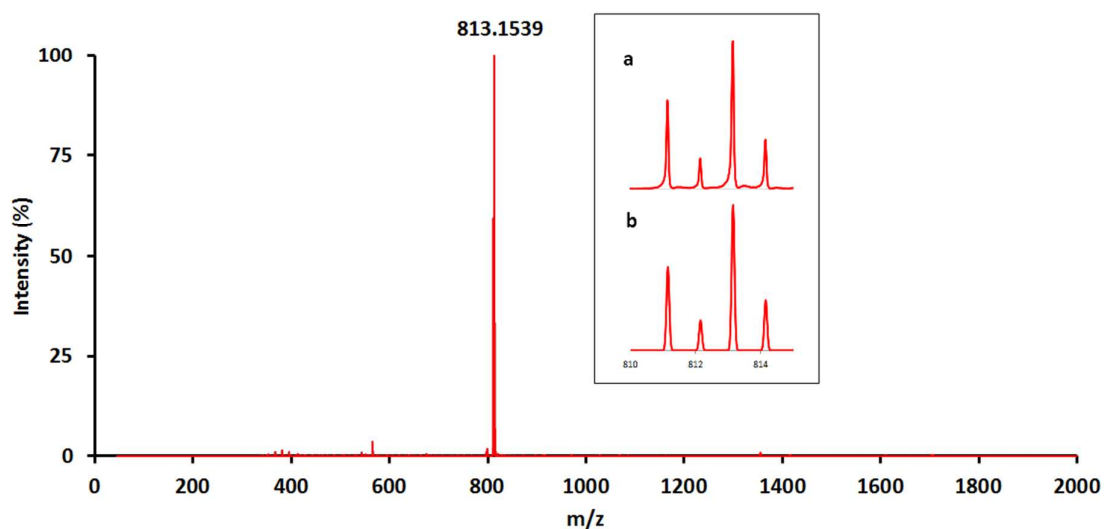

**Figure S 20** HR-ESI-MS spectrum of macrocycle **Re-10a** showing peaks at  $m/z = 813.1539$  due to esterified complex **Re-10a**, inset a) observed and b) calculated isotopic patterns for the peak at  $m/z = 813.1539$  due to  $[\text{Re}(\text{CO})_3 + 10\text{a} - (\text{H} + \text{CH}_3)]^+$  ion.

**[Re(CO)<sub>3</sub>(10b)]Br, (Re-10b)**

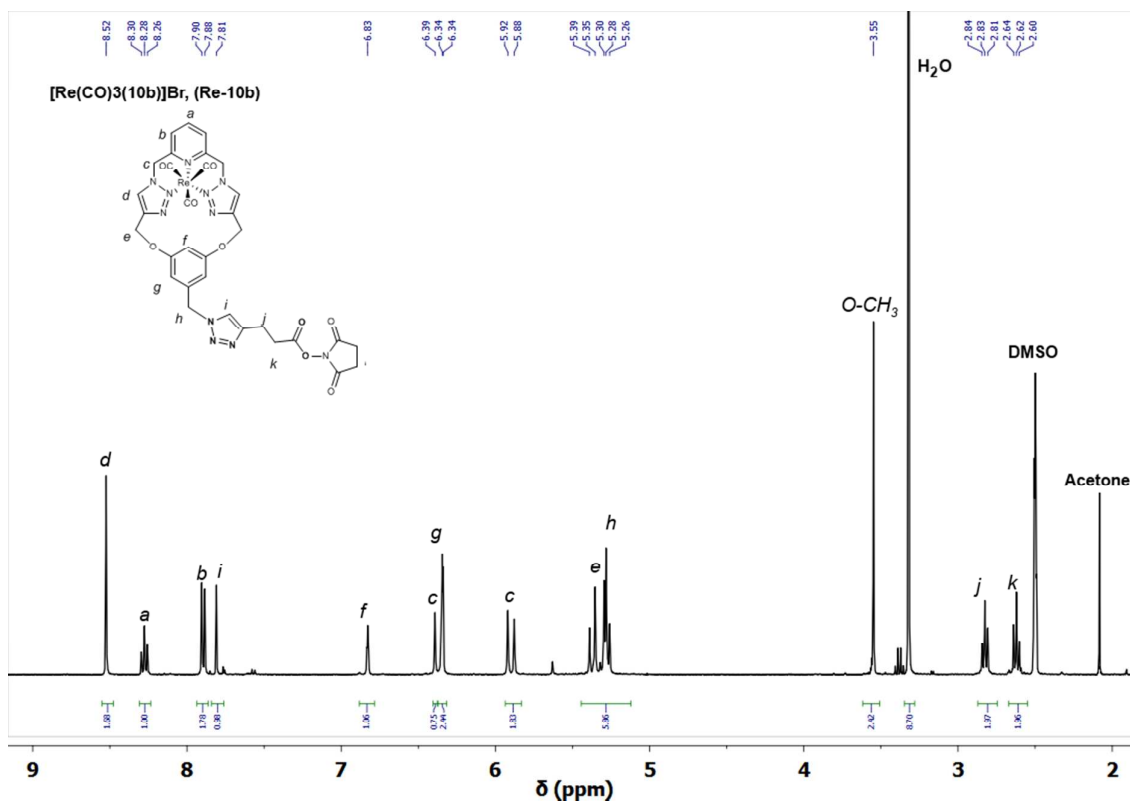

**Figure S 21** <sup>1</sup>H NMR spectrum (400 MHz, DMSO-*d*<sub>6</sub>, 298 K) of macrocycle **Re-10b**

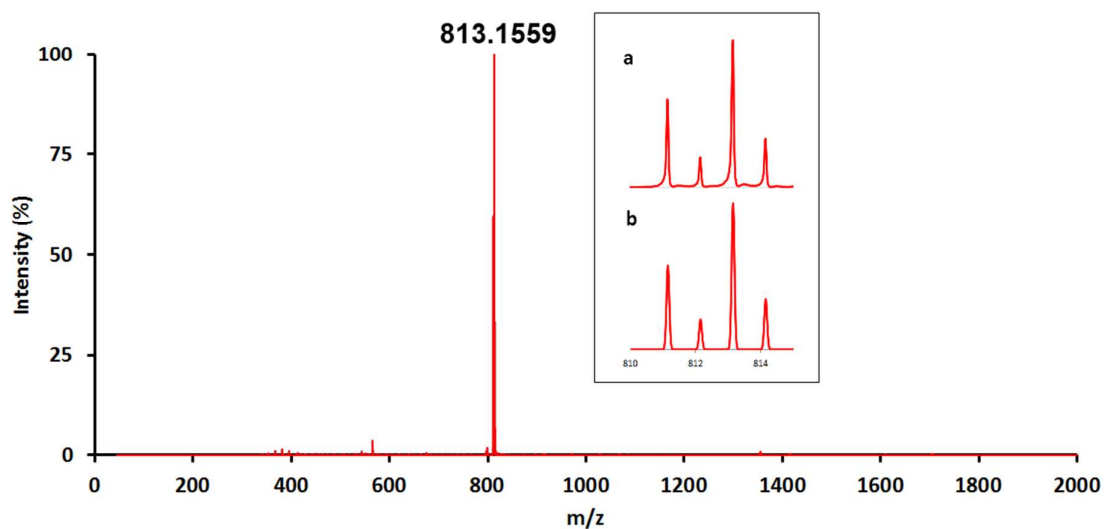

**Figure S 22** HR-ESI-MS spectrum of macrocycle **Re-10b** showing peaks at *m/z* = 813.1559 due to esterified complex **Re-10b**, inset a) observed and b) calculated isotopic patterns for the peak at *m/z* = 813.1539 due to [Re(CO)<sub>3</sub>+10a(-NHS+CH<sub>3</sub>)]<sup>+</sup> ion.

**[Re(CO)<sub>3</sub>(10c)]Br, (Re-10c)**

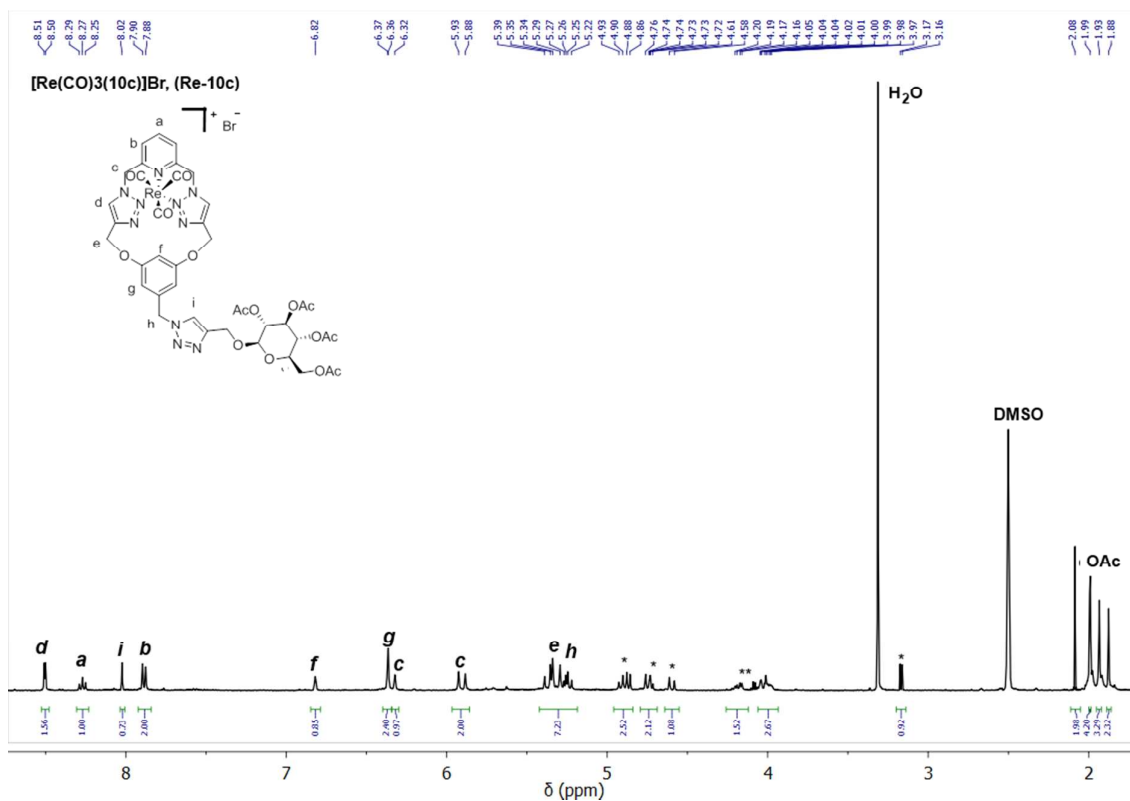

**Figure S 23** <sup>1</sup>H NMR spectrum (400 MHz, DMSO-*d*<sub>6</sub>, 298 K) of macrocycle **Re-10c** (\* peaks from sugar molecule).

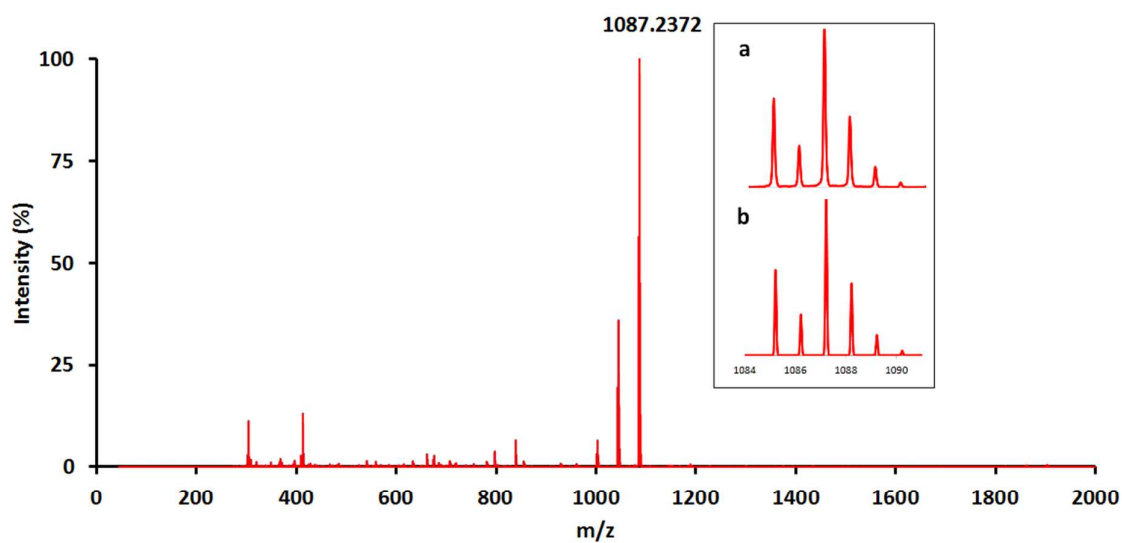

**Figure S 24** HR-ESI-MS spectrum of macrocycle complex **Re-10c**, inset a) observed and b) calculated isotopic patterns for the peak at *m/z* = 1087.2372 due to [Re(CO)<sub>3</sub>+**10c**]<sup>+</sup> ion.

**[Re(CO)<sub>3</sub>(10d)]Br, (Re-10d)**

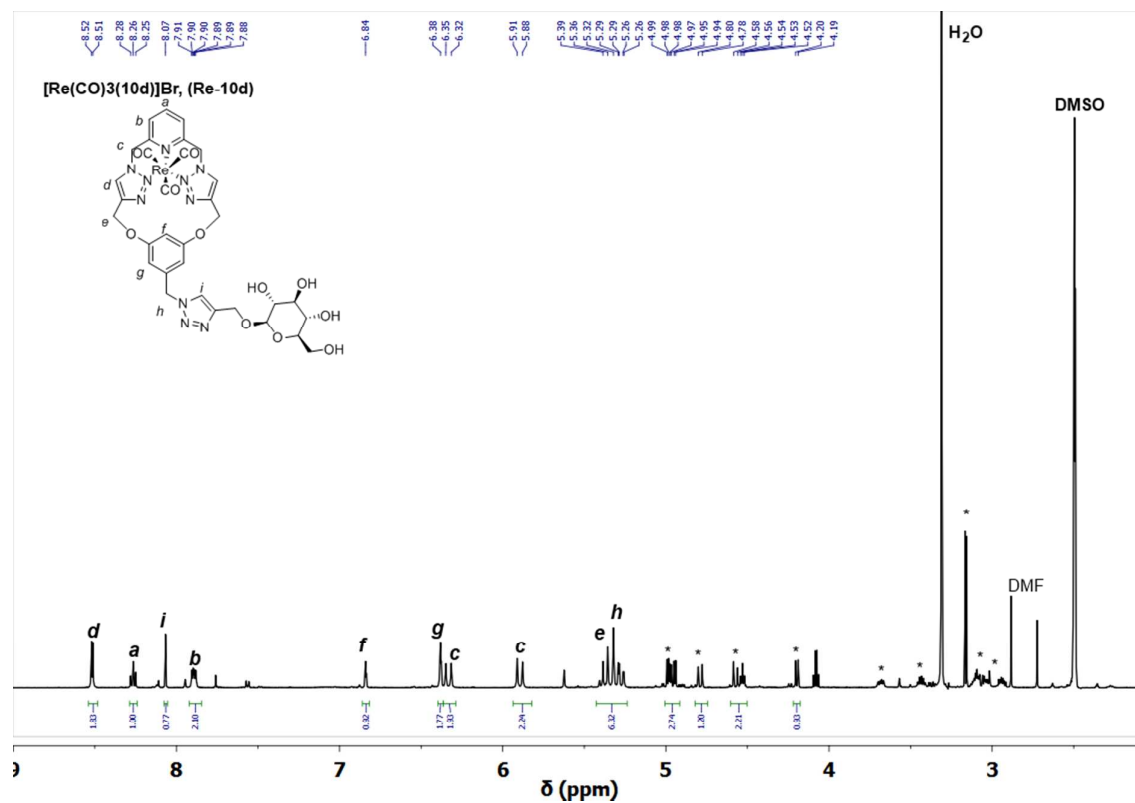

**Figure S 25** <sup>1</sup>H NMR spectrum (500 MHz, DMSO-*d*<sub>6</sub>, 298 K) of macrocycle **Re-10d** (\* peaks from sugar molecule).

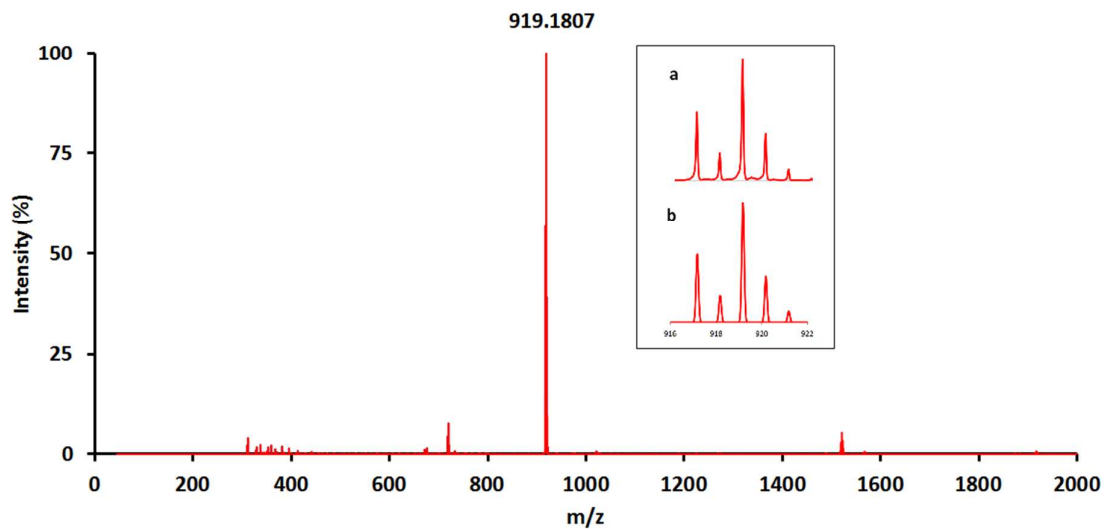

**Figure S 26** HR-ESI-MS spectrum of macrocycle complex **Re-10d**, inset a) observed and b) calculated isotopic patterns for the peak at *m/z* = 919.1807 due to [Re(CO)<sub>3</sub>+10d]<sup>+</sup> ion.

**[Re(CO)<sub>3</sub>(10e)]Br, (Re-10e)**

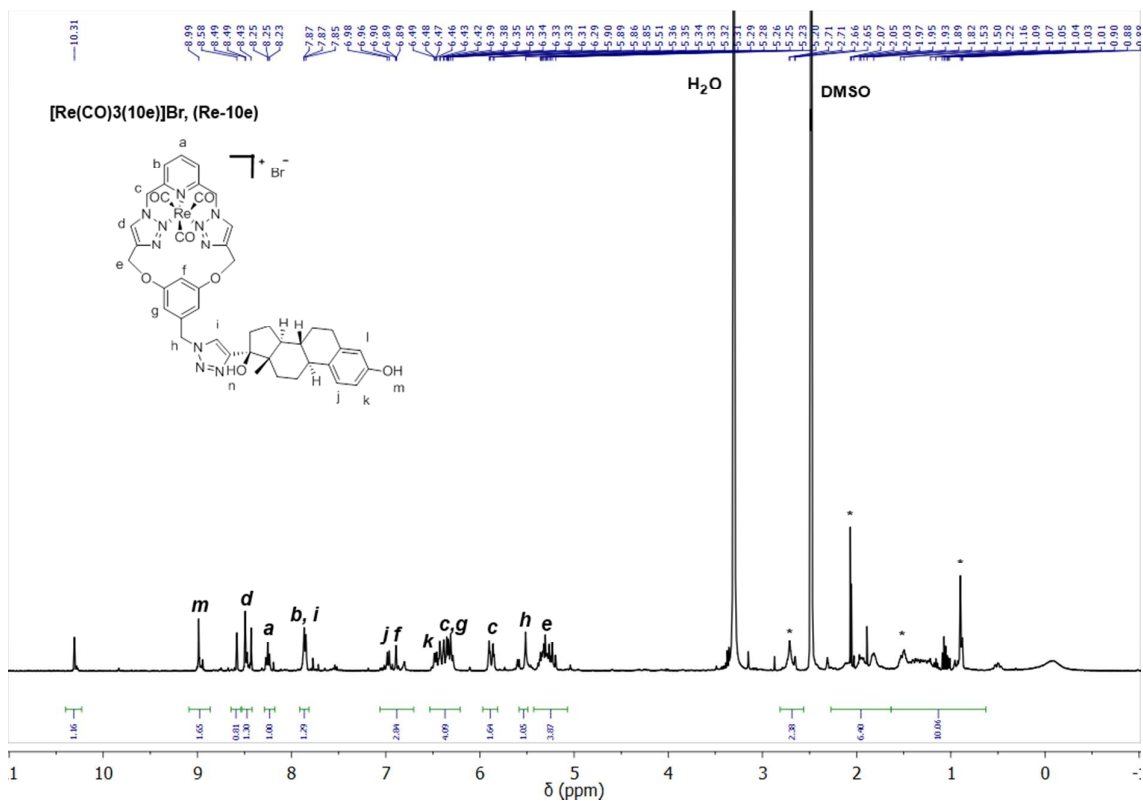

**Figure S 27** <sup>1</sup>H NMR spectrum (400 MHz, DMSO-*d*<sub>6</sub>, 298 K) of macrocycle **Re-10e** (\* peaks from steroid molecule)

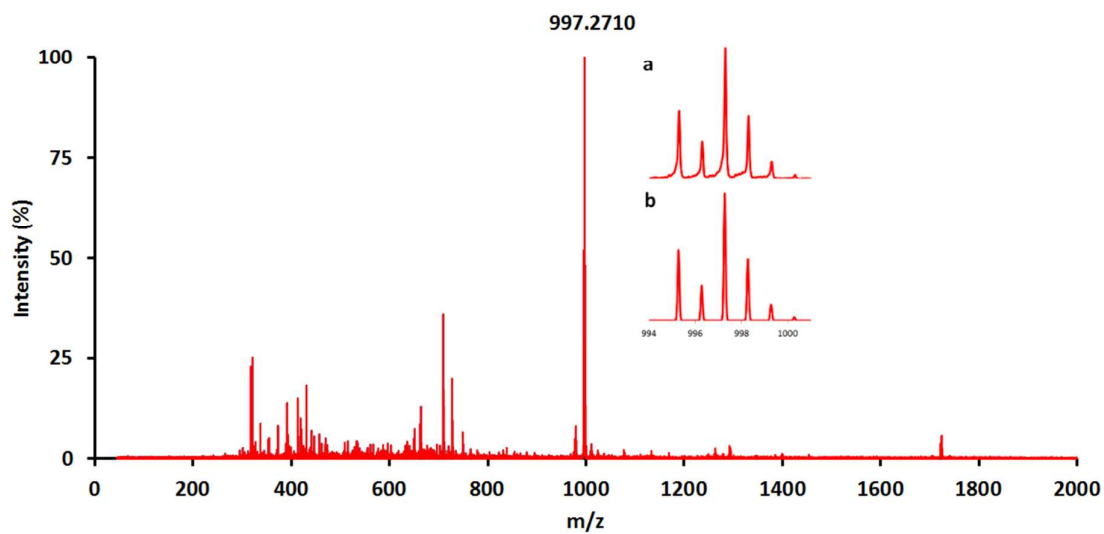

**Figure S 28** HR-ESI-MS spectrum of macrocycle **Re-10e**, inset a) observed and b) calculated isotopic patterns for the peak at *m/z* = 997.2710 due to [Re(CO)<sub>3</sub>+**10e**]<sup>+</sup> ion.

[Re(CO)<sub>3</sub>(10f)]Br, (Re-10f)

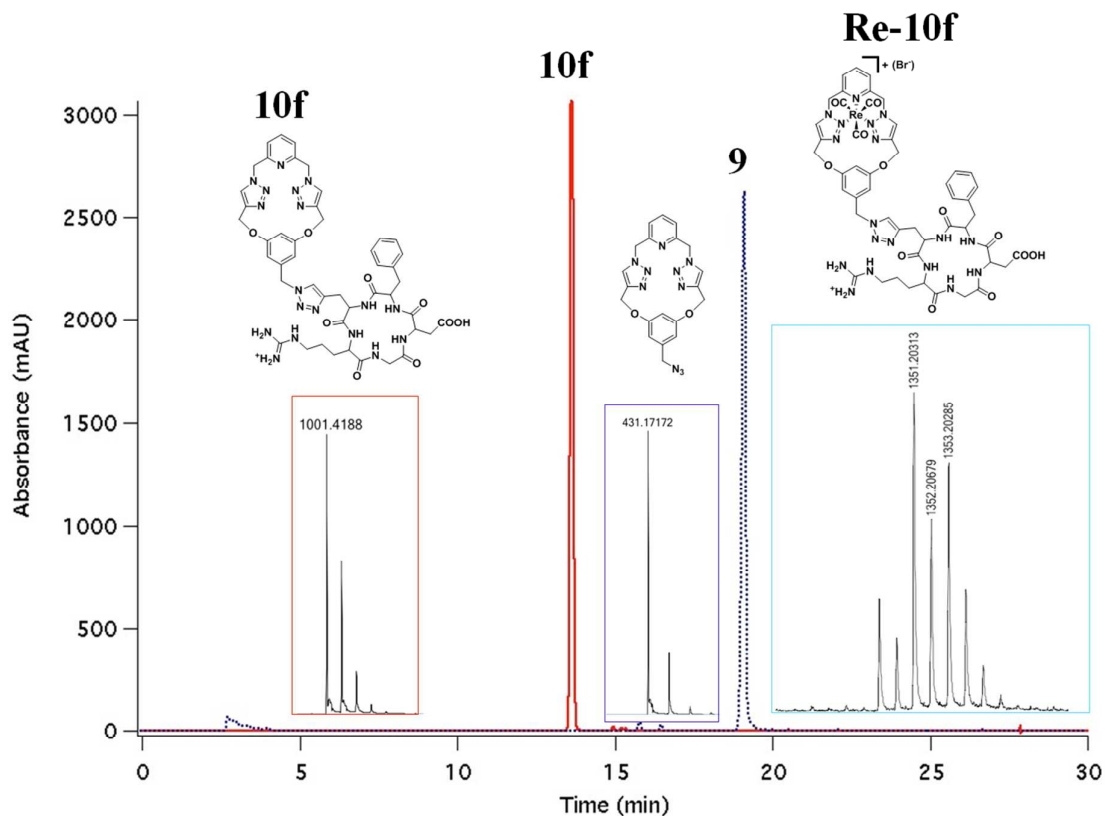

**Figure S 29** RP-HPLC traces for **10f** (Method: 0-60% CH<sub>3</sub>CN), **9** (Method: 0-100% CH<sub>3</sub>CN) and observed ESI-MS isotopic patterns for **10f** ( $m/z = 1001.4188$ ), **9** ( $m/z = 431.1717$ ) and **Re-10f** ( $m/z = 1351.2031$ ).

## 2 Selected stacked $^1\text{H}$ NMR spectra of the ligands and metal complexes

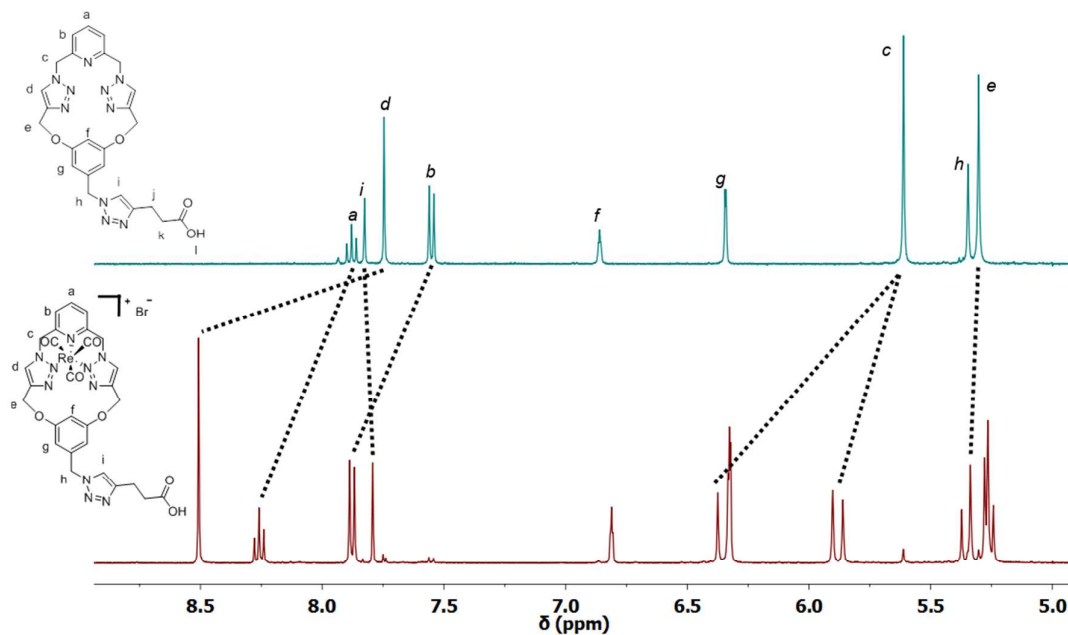

**Figure S 30** Partial stacked  $^1\text{H}$  NMR spectra (400 MHz,  $\text{DMSO-}d_6$ , 298 K) of acid-conjugated macrocycle **10a** and  $[\text{Re}(\text{CO})_3]^+$  complex **Re-10a**.

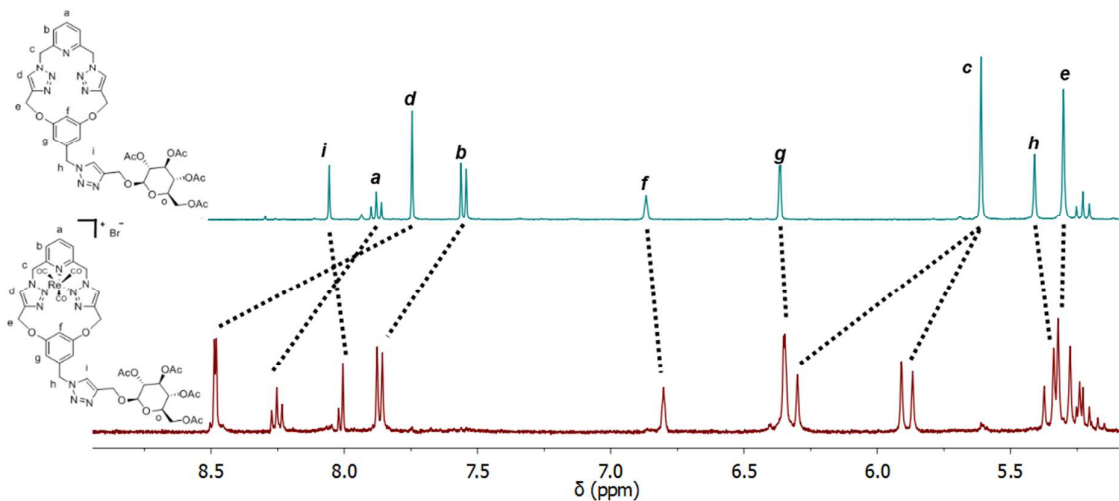

**Figure S 31** Partial stacked  $^1\text{H}$  NMR spectra (400 MHz,  $\text{DMSO-}d_6$ , 298 K) of sugar-conjugated macrocycle **10c** and  $[\text{Re}(\text{CO})_3]^+$  complex **Re-10c**.

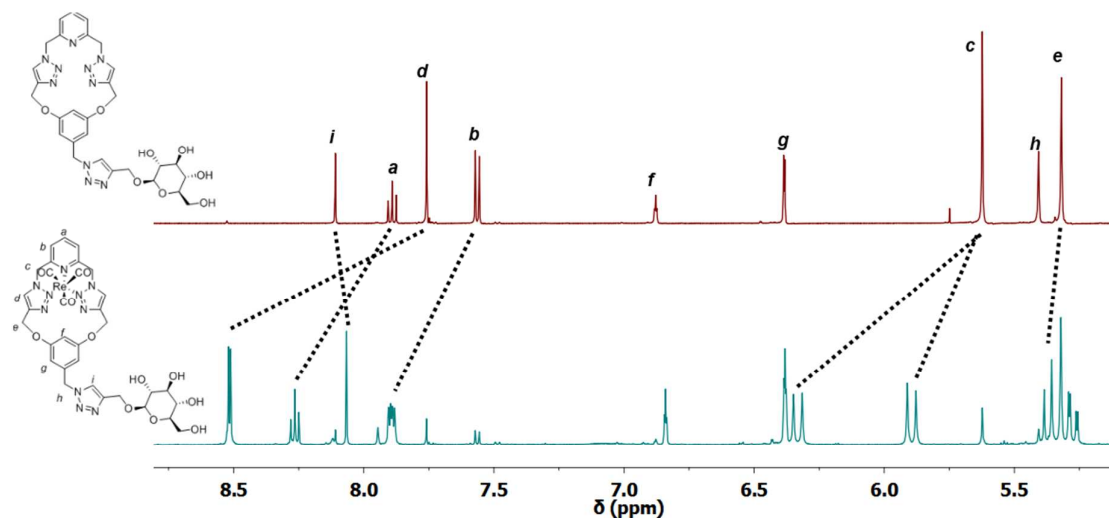

**Figure S 32** Partial stacked  $^1\text{H}$  NMR spectra (400 MHz,  $\text{DMSO-}d_6$ , 298 K) of sugar-conjugated macrocycle **10d** and  $[\text{Re}(\text{CO})_3]^+$  complex **Re-10d**.

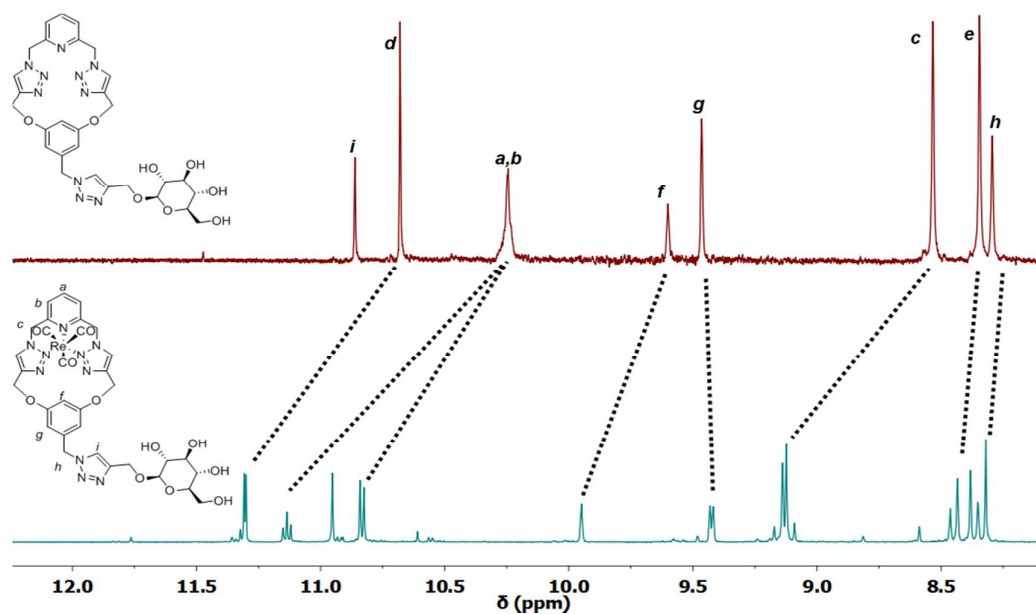

**Figure S 33** Partial stacked  $^1\text{H}$  NMR spectra (400 MHz,  $\text{D}_2\text{O}$ , 298 K) of sugar-conjugated macrocycle **10d** and  $[\text{Re}(\text{CO})_3]^+$  complex **Re-10d** showing aqueous solubility of both ligand and complex at room temperature.

### 3 Stability and Re(I) labelling experiments

#### 3.1 Temperature Stability

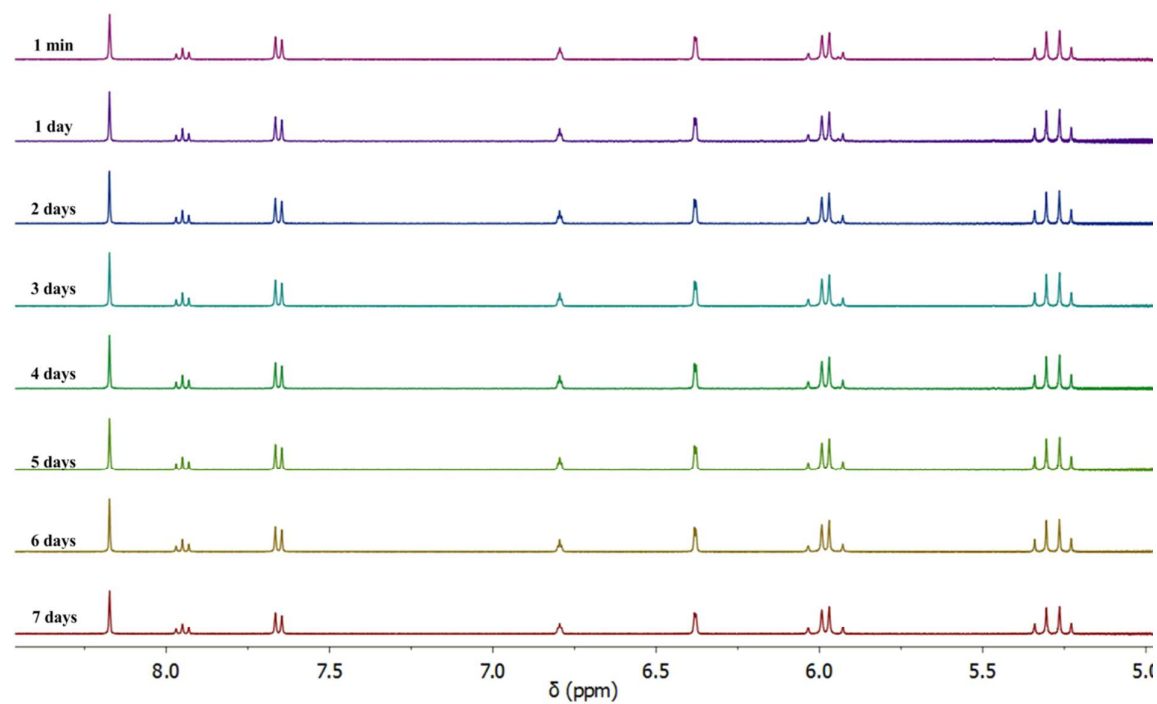

**Figure S 34** Partial  $^1\text{H}$  NMR spectra (400 MHz,  $\text{D}_2\text{O}$ , 298 K) of the Re(I) complex, **7-Re** over a period of one week.

### 3.2 Histidine competition experiments

#### *7-Re vs Histidine*

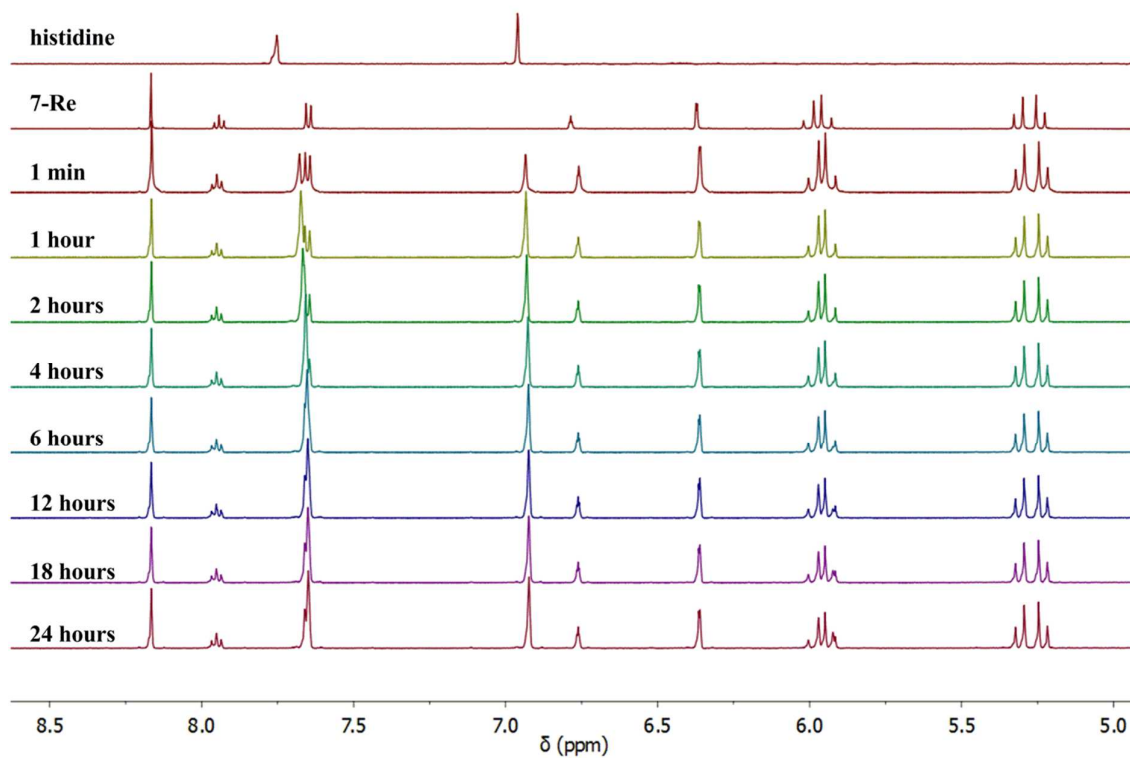

**Figure S 35** Partial  $^1\text{H}$  NMR spectra (500 MHz,  $\text{D}_2\text{O}$ , 313 K) of the histidine competition experiments showing top to bottom, histidine, the Re(I) complex **7-Re**, and the reaction mixtures of both after specified interval of time over 24 hours

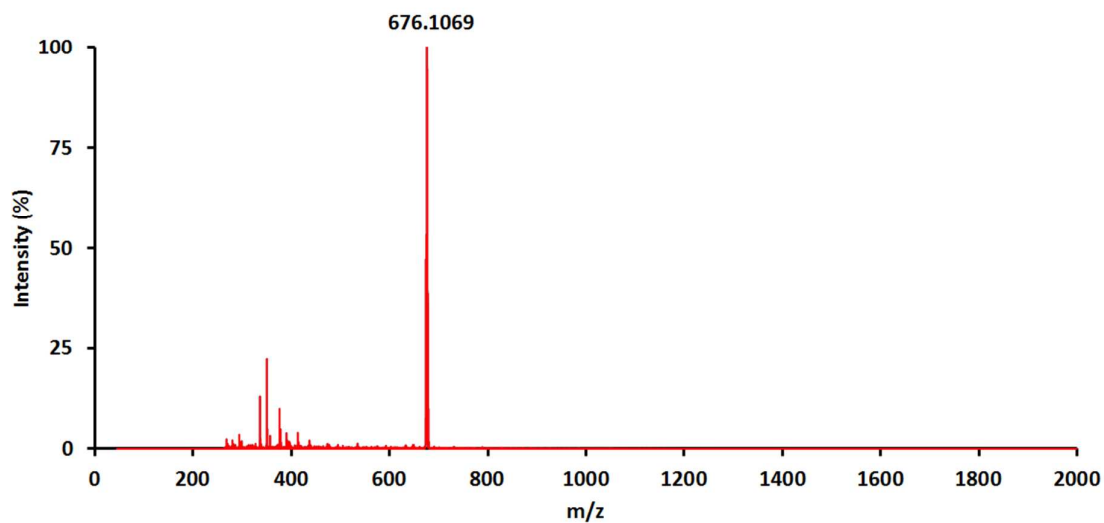

**Figure S 36** HR-ESI-MS spectrum of the reaction mixture after completion of histidine competition experiment showing only major peak due to the  $[\text{Re}(\text{CO})_3+7]^+$  ions at  $m/z = 676.1069$

*10d-Re vs Histidine*

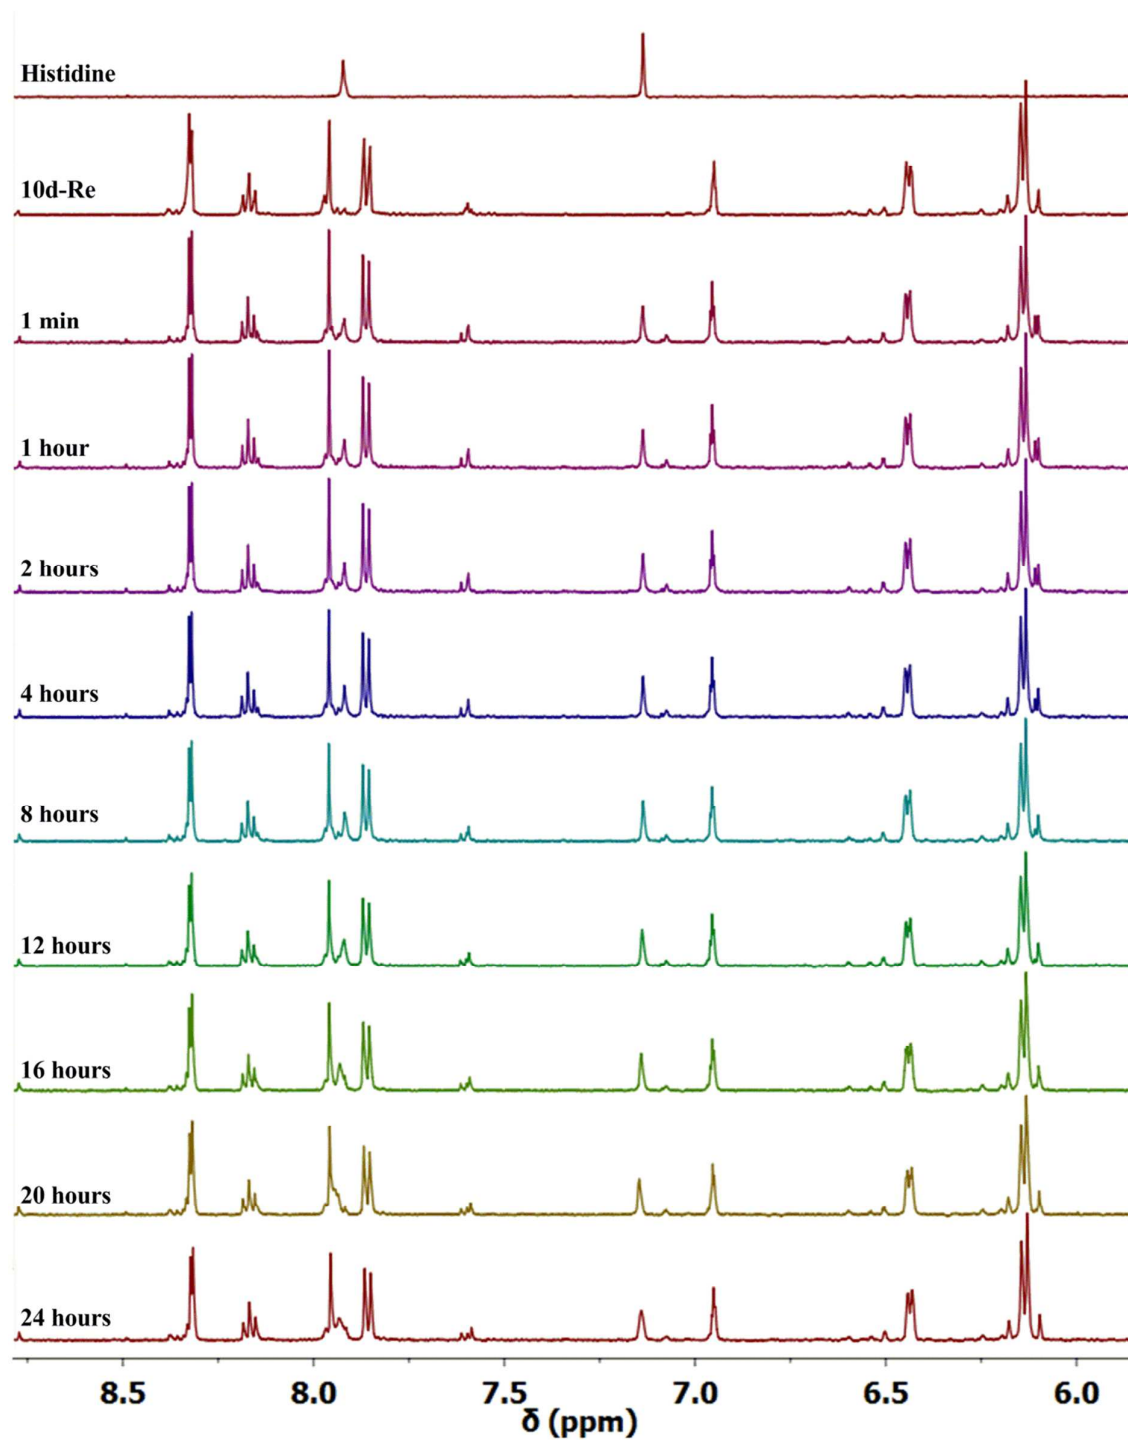

**Figure S 37** Partial <sup>1</sup>H NMR spectra (500 MHz, D<sub>2</sub>O, 313 K) of the histidine competition experiments showing top to bottom, histidine, the Re(I) complex **10d-Re**, and the reaction mixtures of both after specified interval of time over 24 hours

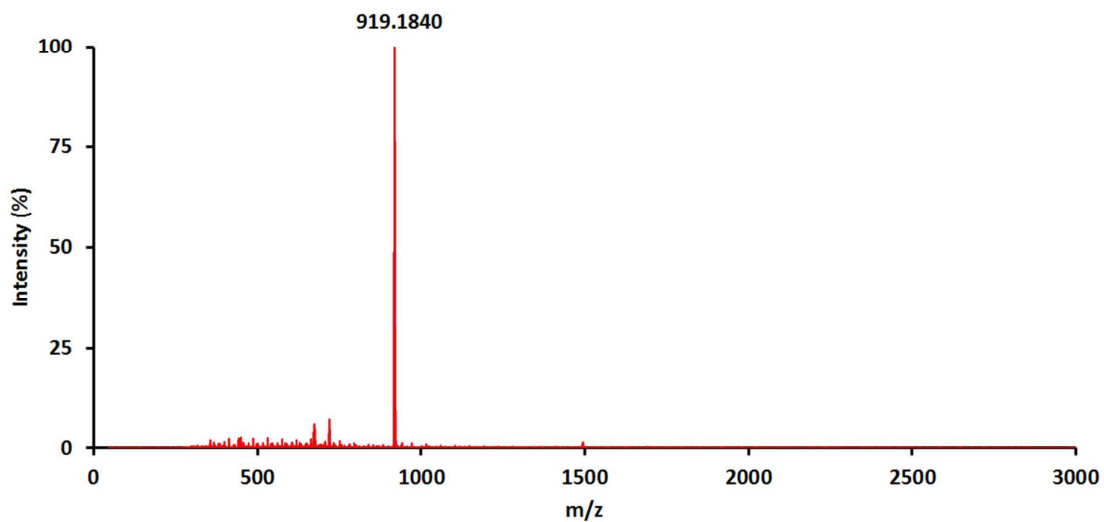

**Figure S 38** HR-ESI-MS spectrum of reaction mixture after completion of histidine competition experiment showing only a major peak due to the  $[\text{Re}(\text{CO})_3 + \mathbf{10d}]^+$  ions at  $m/z = 919.1840$

### 3.3 Labelling experiment of 7-Re

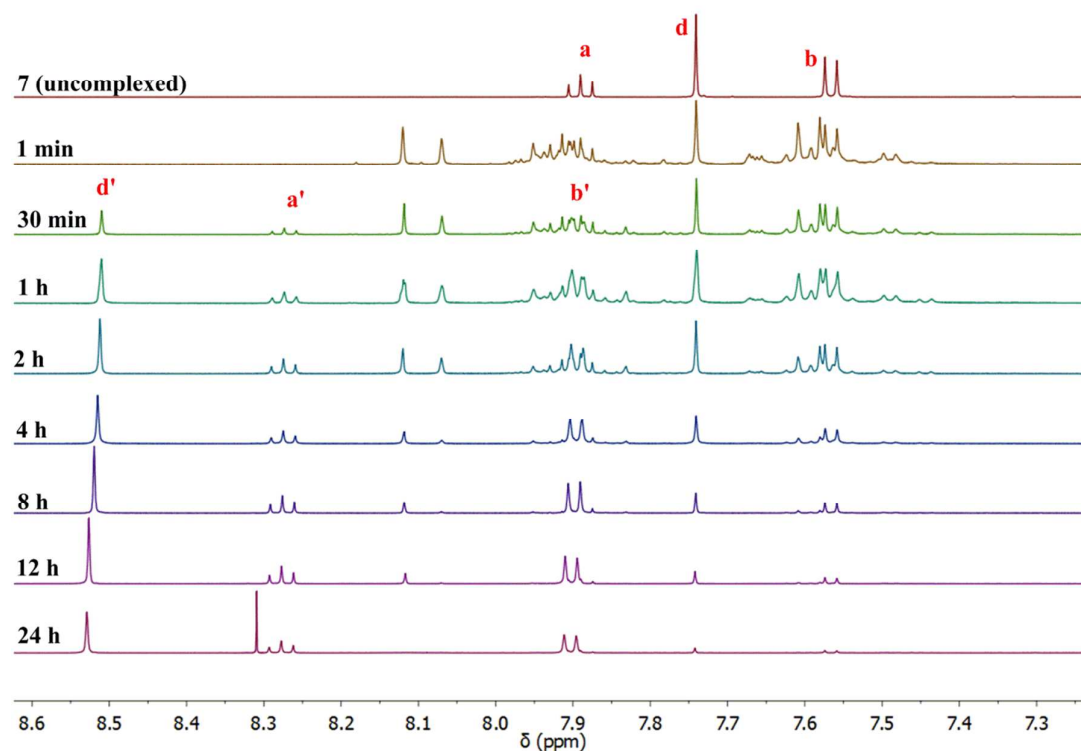

**Figure S 39** Partial  $^1\text{H}$  NMR spectra (500 MHz,  $\text{DMSO-}d_6$ , 298 K) of the labelling time experiments showing top to bottom, uncomplexed macrocycle **7**, and the reaction mixture containing **7** and **7-Re** after specified interval of time over 24 hours

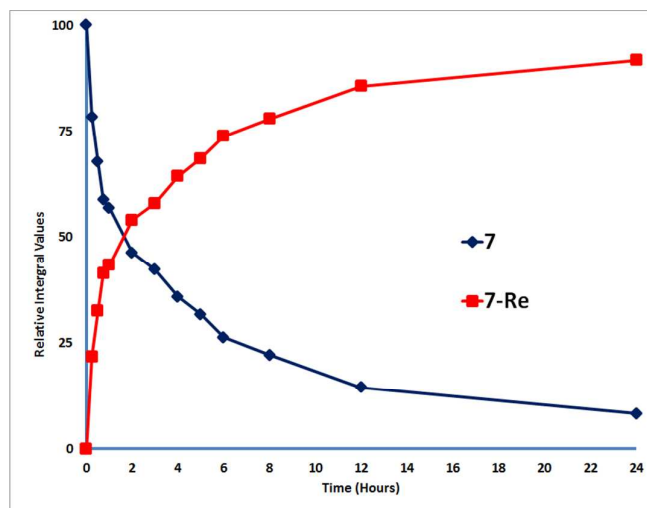

**Figure S 40** Time vs integral values of the NMR labelling experiment of **7-Re**

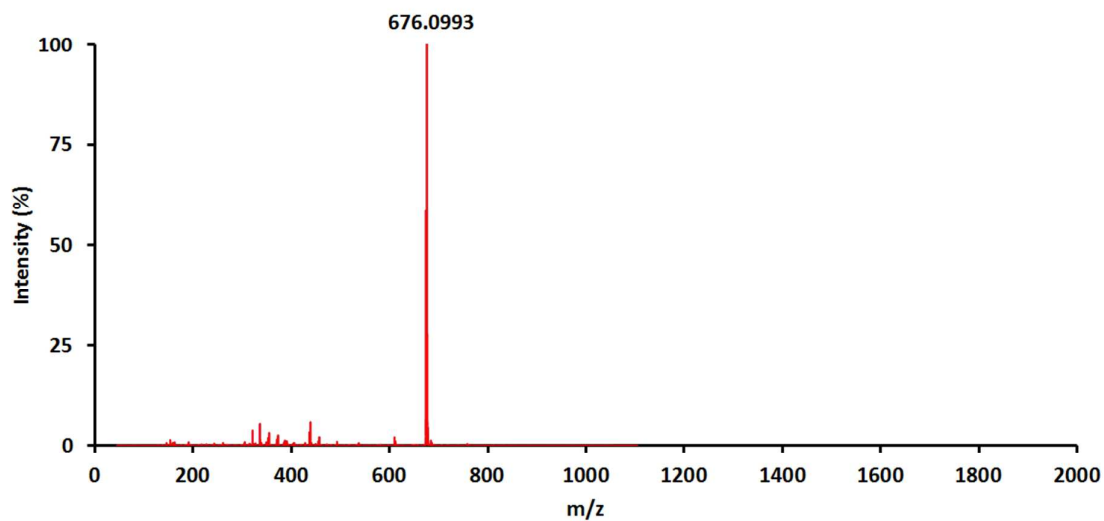

**Figure S 41** HR-ESI-MS spectrum of reaction mixture after completion of labelling experiment showing only a major peak due to the  $[\text{Re}(\text{CO})_3+7]^+$  ions at  $m/z$  676.0993.

#### 4 Antibacterial Activity

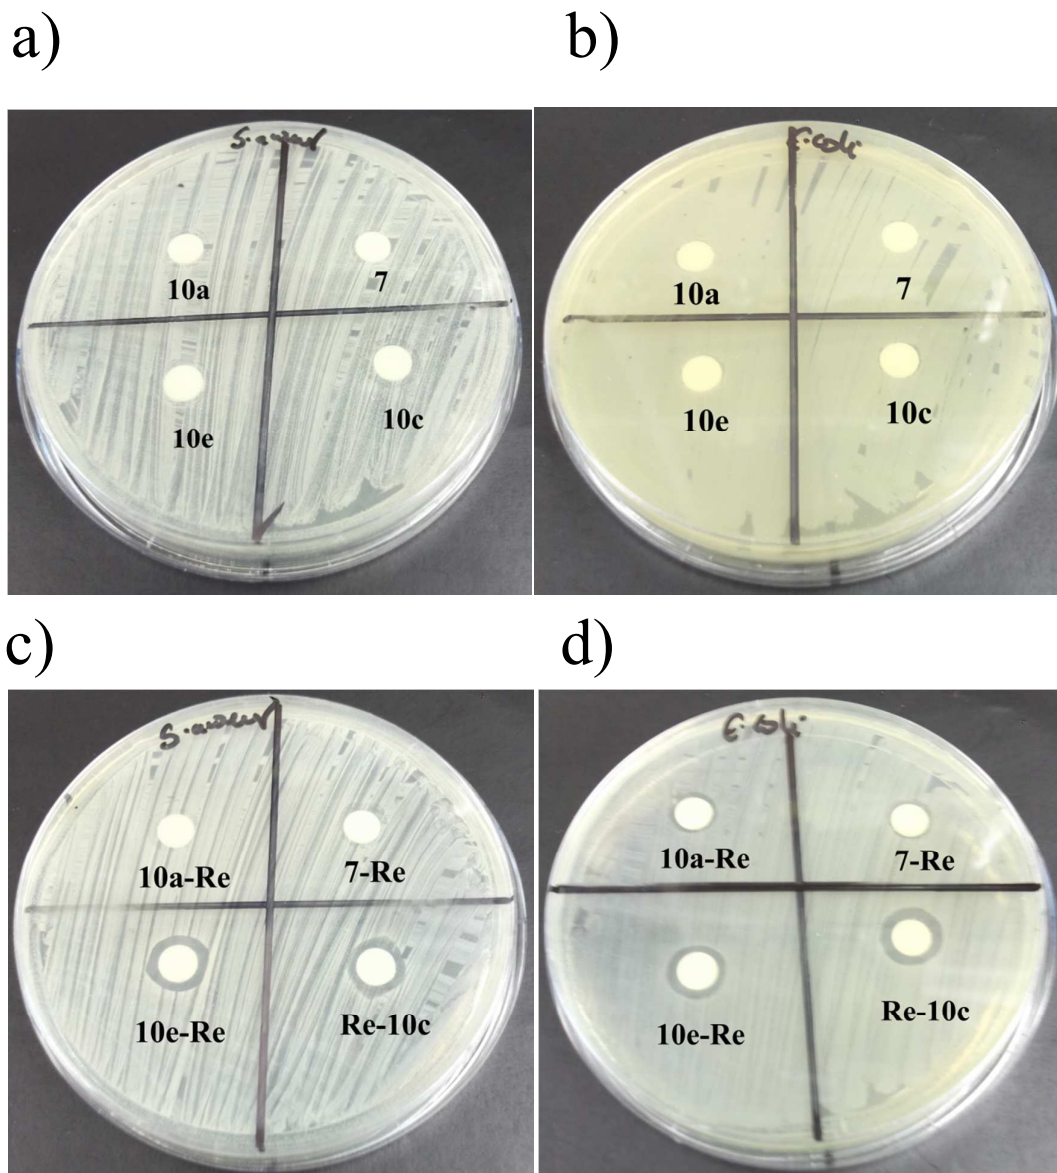

**Figure S 42** a) & b) Disk diffusion assay of ligands on *S. aureus* and *E. coli*. c) & d) Disk diffusion assay of rhenium complexes on *S. aureus* and *E. coli*.

## 5 Photophysical Properties and Density Functional Theory Calculations

**Table S 1** Calculated bond lengths and angles for **7-Re**

| crystal structure | B3LYP           |       | PBE0            |       | CAM-B3LYP       |       | M06             |       | M062X           |       |
|-------------------|-----------------|-------|-----------------|-------|-----------------|-------|-----------------|-------|-----------------|-------|
| Bond Length (Å)   | Bond Length (Å) | Error |
| <b>Re-N2</b>      | 2.160           |       | 2.205           | 2.06% | 2.175           | 0.67% | 2.191           | 1.44% | 2.200           | 1.86% |
| <b>Re-N4</b>      | 2.252           |       | 2.306           | 2.41% | 2.259           | 0.31% | 2.285           | 1.48% | 2.295           | 1.93% |
| <b>Re-N6</b>      | 2.158           |       | 2.207           | 2.27% | 2.177           | 0.87% | 2.193           | 1.64% | 2.205           | 2.16% |
| Angle (°)         | Angle (°)       | Error |
| <b>N4-Re-N2</b>   | 79.14           |       | 79.95           | 1.03% | 80.46           | 1.66% | 79.98           | 1.06% | 79.76           | 0.79% |
| <b>N4-Re-N6</b>   | 80.44           |       | 79.90           | 0.68% | 80.38           | 0.08% | 79.93           | 0.63% | 79.51           | 1.16% |
| <b>N2-Re-N6</b>   | 86.14           |       | 89.72           | 4.15% | 89.65           | 4.08% | 89.45           | 3.84% | 89.34           | 3.71% |

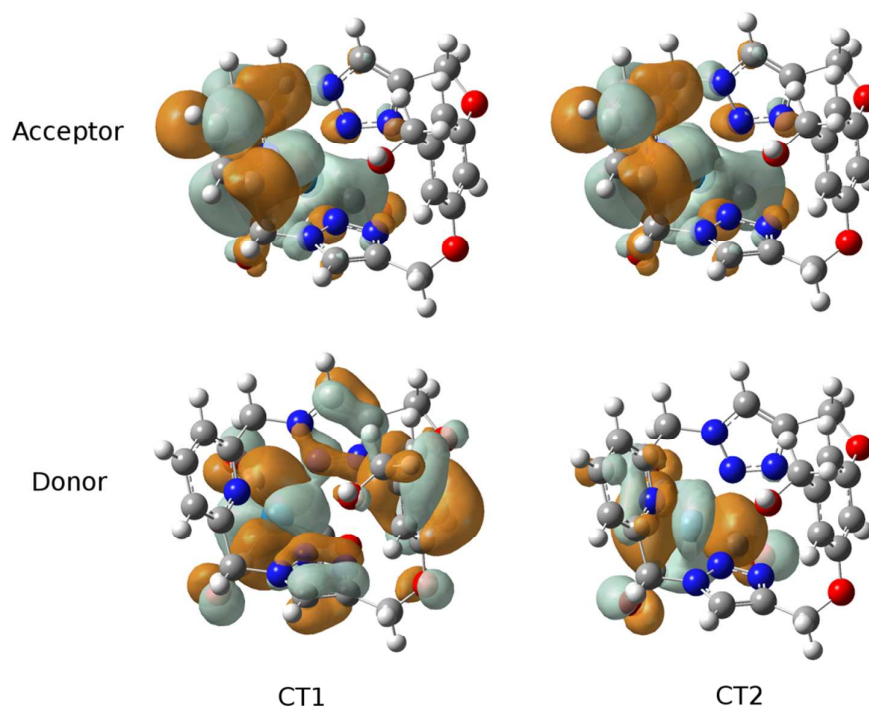

**Figure S 43** Natural transitions orbitals for **7-Re** using M062X/6-31G(d)-LANL2DZ

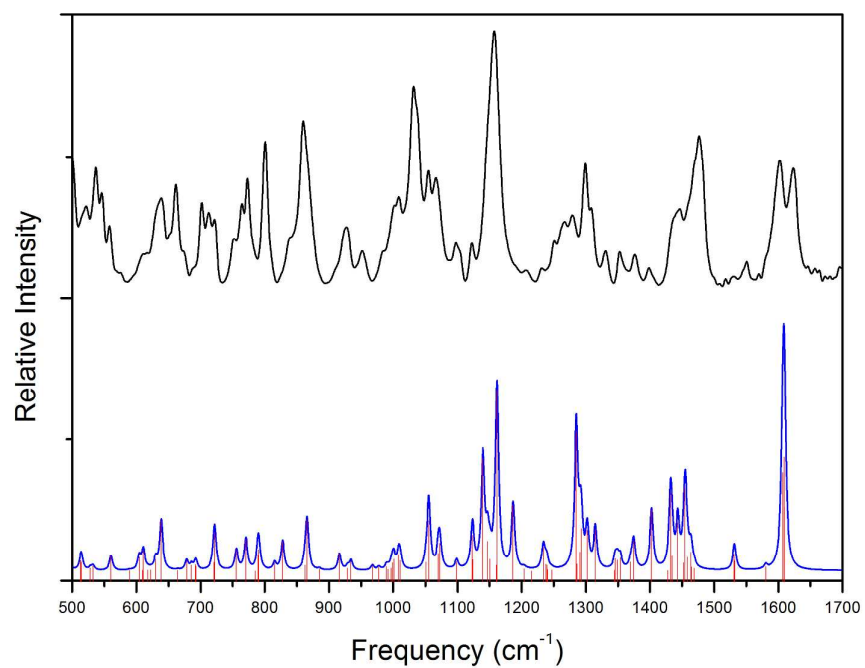

**Figure S 44** ATR-IR spectrum of **7-Re** (top) and Calculated IR spectrum using CAM-B3LYP/6-31G(d)-LANL2DZ (bottom)

## 6 X-Ray data collection and refinement

### 6.1 Macrocycle (7)

X-Ray data for **7** was recorded using a Bruker APEX II CCD diffractometer using Mo-K $\alpha$  radiation ( $\lambda = 0.71073$  Å). The structure was solved in the monoclinic space group  $C2/c$  and refined to a  $R_1$  value 7.2%. Hydrogen atoms were placed in calculated positions and refined using a riding model.

### 6.2 Re(I) complex of macrocycle (7-Re)

X-Ray data for **7-Re** was recorded using a Bruker APEX II CCD diffractometer using Mo-K $\alpha$  radiation ( $\lambda = 0.71073$  Å). The structure was solved in triclinic space group  $P\bar{1}$  using Fourier methods and refined using SHELXL<sup>1</sup> to a  $R_1$  value 6.3%. Hydrogen atoms were placed in calculated positions and refined using a riding model.

### 6.3 Re(I) complex of macrocycle (Re-10a)

X-ray data for macrocycle **Re-10a** was collected at 100 K on a CrysAlisPro<sup>2</sup>, Agilent Technologies diffractometer using Mo-K $\alpha$  radiation ( $\lambda = 0.71073$  Å). The structure was solved by direct methods and refined against  $F^2$  using anisotropic thermal displacement parameters for all non-hydrogen atoms using the xSeed<sup>3</sup> and SHELXS-97<sup>4</sup> program to a  $R_1$  value 5.7%.. Hydrogen atoms were placed in calculated positions and refined using a riding model. The crystal lattice contained a small amount of diffuse electron density that could not be appropriately modelled. The SQUEEZE routine within PLATON was employed to resolve this problem. Void electron count of 58 electrons can be accounted for by four molecules of water (10 electrons each) and a molecule of methanol (18 electrons) to give a total electron count of 58.

## 6.4 Structure Refinement Data

**Table S2** Crystal data and structure refinement for macrocycle **7**

|                                   |                                                               |                  |
|-----------------------------------|---------------------------------------------------------------|------------------|
| <b>CCDC</b>                       | 991260                                                        |                  |
| Empirical formula                 | C <sub>20</sub> H <sub>19</sub> N <sub>7</sub> O <sub>3</sub> |                  |
| Formula weight                    | 405.42                                                        |                  |
| Temperature                       | 93(2) K                                                       |                  |
| Wavelength                        | 0.71073 Å                                                     |                  |
| Crystal system                    | Monoclinic                                                    |                  |
| Space group                       | C <sub>2</sub> /c                                             |                  |
| Unit cell dimensions              | a = 8.918(3) Å                                                | α = 90°.         |
|                                   | b = 16.352(4) Å                                               | β = 96.008(11)°. |
|                                   | c = 25.482(7) Å                                               | γ = 90°.         |
| Volume                            | 3695.7(17) Å <sup>3</sup>                                     |                  |
| Z                                 | 8                                                             |                  |
| Density (calculated)              | 1.457 Mg/m <sup>3</sup>                                       |                  |
| Absorption coefficient            | 0.103 mm <sup>-1</sup>                                        |                  |
| F(000)                            | 1696                                                          |                  |
| Crystal size                      | 0.22 x 0.21 x 0.05 mm <sup>3</sup>                            |                  |
| Theta range for data collection   | 1.61 to 20.21°.                                               |                  |
| Index ranges                      | -8 ≤ h ≤ 8, -15 ≤ k ≤ 15, -24 ≤ l ≤ 24                        |                  |
| Reflections collected             | 11510                                                         |                  |
| Independent reflections           | 1761 [R(int) = 0.0826]                                        |                  |
| Completeness to theta = 20.21°    | 99.5 %                                                        |                  |
| Absorption correction             | Semi-empirical from equivalents                               |                  |
| Max. and min. transmission        | 0.9949 and 0.9777                                             |                  |
| Refinement method                 | Full-matrix least-squares on F <sup>2</sup>                   |                  |
| Data / restraints / parameters    | 1761 / 0 / 273                                                |                  |
| Goodness-of-fit on F <sup>2</sup> | 1.144                                                         |                  |
| Final R indices [I > 2σ(I)]       | R1 = 0.0725, wR2 = 0.1684                                     |                  |
| R indices (all data)              | R1 = 0.0873, wR2 = 0.1800                                     |                  |
| Extinction coefficient            | 0.0024(5)                                                     |                  |
| Largest diff. peak and hole       | 0.332 and -0.250 e.Å <sup>-3</sup>                            |                  |

**Table S3** Crystal data and structure refinement for Re(I) complex **7-Re**

|                                   |                                                                    |                         |
|-----------------------------------|--------------------------------------------------------------------|-------------------------|
| CCDC                              | 991258                                                             |                         |
| Empirical formula                 | C <sub>23</sub> H <sub>19</sub> BrN <sub>7</sub> O <sub>6</sub> Re |                         |
| Formula weight                    | 755.56                                                             |                         |
| Temperature                       | 89(2) K                                                            |                         |
| Wavelength                        | 0.71073 Å                                                          |                         |
| Crystal system                    | Triclinic                                                          |                         |
| Space group                       | <i>P</i> $\bar{1}$                                                 |                         |
| Unit cell dimensions              | a = 9.5826(17) Å                                                   | $\alpha$ = 66.484(11)°. |
|                                   | b = 11.031(2) Å                                                    | $\beta$ = 76.119(11)°.  |
|                                   | c = 13.594(3) Å                                                    | $\gamma$ = 70.788(11)°. |
| Volume                            | 1234.5(4) Å <sup>3</sup>                                           |                         |
| Z                                 | 2                                                                  |                         |
| Density (calculated)              | 2.033 Mg/m <sup>3</sup>                                            |                         |
| Absorption coefficient            | 6.595 mm <sup>-1</sup>                                             |                         |
| F(000)                            | 728                                                                |                         |
| Crystal size                      | 0.15 x 0.12 x 0.05 mm <sup>3</sup>                                 |                         |
| Theta range for data collection   | 1.65 to 26.54°.                                                    |                         |
| Index ranges                      | -11 ≤ h ≤ 11, -13 ≤ k ≤ 13, -17 ≤ l ≤ 17                           |                         |
| Reflections collected             | 32686                                                              |                         |
| Independent reflections           | 5000 [R(int) = 0.0988]                                             |                         |
| Completeness to theta = 26.54°    | 97.6 %                                                             |                         |
| Absorption correction             | Semi-empirical from equivalents                                    |                         |
| Max. and min. transmission        | 0.7339 and 0.4379                                                  |                         |
| Refinement method                 | Full-matrix least-squares on F <sup>2</sup>                        |                         |
| Data / restraints / parameters    | 5000 / 0 / 344                                                     |                         |
| Goodness-of-fit on F <sup>2</sup> | 1.070                                                              |                         |
| Final R indices [I > 2sigma(I)]   | R1 = 0.0633, wR2 = 0.1573                                          |                         |
| R indices (all data)              | R1 = 0.0996, wR2 = 0.1866                                          |                         |
| Largest diff. peak and hole       | 3.019 and -2.161 e.Å <sup>-3</sup>                                 |                         |

**Table S4** Crystal data and structure refinement for **Re-10a**

|                                   |                                                                     |                         |
|-----------------------------------|---------------------------------------------------------------------|-------------------------|
| CCDC                              | 991259                                                              |                         |
| Empirical formula                 | C <sub>29</sub> H <sub>26</sub> BrN <sub>10</sub> O <sub>7</sub> Re |                         |
| Formula weight                    | 892.71                                                              |                         |
| Temperature                       | 100.0(1) K                                                          |                         |
| Wavelength                        | 0.71073 Å                                                           |                         |
| Crystal system                    | Triclinic                                                           |                         |
| Space group                       | <i>P</i> $\bar{1}$                                                  |                         |
| Unit cell dimensions              | a = 10.4722(4) Å                                                    | $\alpha$ = 93.303(3)°.  |
|                                   | b = 16.0868(8) Å                                                    | $\beta$ = 90.356(3)°.   |
|                                   | c = 23.1434(7) Å                                                    | $\gamma$ = 108.644(4)°. |
| Volume                            | 3686.8(3) Å <sup>3</sup>                                            |                         |
| Z                                 | 4                                                                   |                         |
| Density (calculated)              | 1.608 Mg/m <sup>3</sup>                                             |                         |
| Absorption coefficient            | 4.434 mm <sup>-1</sup>                                              |                         |
| F(000)                            | 1744                                                                |                         |
| Crystal size                      | 0.20 x 0.17 x 0.06 mm <sup>3</sup>                                  |                         |
| Theta range for data collection   | 2.88 to 26.37°.                                                     |                         |
| Index ranges                      | -13 ≤ h ≤ 12, -20 ≤ k ≤ 20, -28 ≤ l ≤ 28                            |                         |
| Reflections collected             | 31782                                                               |                         |
| Independent reflections           | 14778 [R(int) = 0.0483]                                             |                         |
| Completeness to theta = 26.37°    | 98.6 %                                                              |                         |
| Absorption correction             | Semi-empirical from equivalents                                     |                         |
| Max. and min. transmission        | 0.7768 and 0.4708                                                   |                         |
| Refinement method                 | Full-matrix least-squares on F <sup>2</sup>                         |                         |
| Data / restraints / parameters    | 14778 / 35 / 869                                                    |                         |
| Goodness-of-fit on F <sup>2</sup> | 1.043                                                               |                         |
| Final R indices [I > 2sigma(I)]   | R1 = 0.0572, wR2 = 0.1491                                           |                         |
| R indices (all data)              | R1 = 0.0772, wR2 = 0.1598                                           |                         |
| Largest diff. peak and hole       | 2.784 and -2.246 e.Å <sup>-3</sup>                                  |                         |

**Table S5** Selected bond lengths (Å) and angles (°) for **7-Re**, **Re-10a** and similar acyclic complex  $[\text{Re}(\text{CO})_3(4 \text{ R} = \text{C}_3\text{H}_7)]\text{PF}_6$  (atom labels in bold correspond to the labelling of structure **Re-10a** in **Figure S19**)

|                                             | <b>7-Re</b> | <b>Re-10a</b> | $[\text{Re}(\text{CO})_3(4 \text{ R} = \text{C}_3\text{H}_7)]\text{PF}_6^5$ |
|---------------------------------------------|-------------|---------------|-----------------------------------------------------------------------------|
| <b>Bond Lengths (Å)</b>                     |             |               |                                                                             |
| Re(1)-C(30)/ <b>C(29)</b>                   | 1.907(11)   | 1.906(9)      | 1.928(9)                                                                    |
| Re(1)-C(32)/ <b>C(27)</b>                   | 1.917(14)   | 1.926(10)     | 1.924(5)                                                                    |
| Re(1)-C(31)/ <b>C(28)</b>                   | 1.921(16)   | 1.934(10)     | 1.934(8)                                                                    |
| Re(1)-N(6)                                  | 2.158(9)    | 2.179(6)      | 2.173(3)                                                                    |
| Re(1)-N(2)/ <b>N(3)</b>                     | 2.159(9)    | 2.171(6)      | 2.155(4)                                                                    |
| Re(1)-N(4)/ <b>N(1)</b>                     | 2.252(11)   | 2.241(6)      | 2.252(3)                                                                    |
| <b>Bond Angles (°)</b>                      |             |               |                                                                             |
| <b>C(29)</b> /C(30)-Re(1)-N(6)              | 92.9(5)     | 90.8(3)       | 91.47(16)                                                                   |
| <b>C(27)</b> /C(32)-Re(1)-N(6)              | 178.4(4)    | 175.8(3)      | 176.92(15)                                                                  |
| <b>C(28)</b> /C(31)-Re(1)-N(6)              | 91.7(4)     | 94.5(3)       | 94.64(16)                                                                   |
| <b>C(29)</b> /C(30)-Re(1)-N(2)/ <b>N(3)</b> | 178.8(4)    | 177.5(3)      | 177.96(15)                                                                  |
| <b>C(27)</b> /C(32)-Re(1)-N(2)/ <b>N(3)</b> | 95.5(4)     | 96.3(3)       | 95.55(16)                                                                   |
| <b>C(28)</b> /C(31)-Re(1)-N(2)/ <b>N(3)</b> | 91.7(4)     | 92.5(3)       | 91.77(17)                                                                   |
| N(6)-Re(1)-N(2)/ <b>N(3)</b>                | 86.1(3)     | 86.9(2)       | 79.9(2)                                                                     |
| <b>C(29)</b> /C(30)-Re(1)-N(4)/ <b>N(1)</b> | 101.3(5)    | 101.8(3)      | 101.35(16)                                                                  |
| <b>C(27)</b> /C(32)-Re(1)-N(4)/ <b>N(1)</b> | 100.3(5)    | 98.5(3)       | 97.88(15)                                                                   |
| <b>C(28)</b> /C(31)-Re(1)-N(4)/ <b>N(1)</b> | 168.2(4)    | 169.6(3)      | 169.64(15)                                                                  |
| <b>N(6)</b> -Re(1)-N(4)/ <b>N(1)</b>        | 80.3(4)     | 79.6(2)       | 80.9(2)                                                                     |
| <b>N(3)</b> /N(2)-Re(1)-N(4)/ <b>N(1)</b>   | 79.1(3)     | 78.7(2)       | 78.95(13)                                                                   |

## 7 References

1. Sheldrick, G. M., *Act. Crys. Sec. A: Found. Crys.* **2008**, *A64*, 112-122.
2. CrysAlisPro, *Agilent Technologies: Yarnton, Oxfordshire, England*, 2012.
3. Barbour, L. J., *J. Supramol. Chem.* **2001**, *1*, 189-191.
4. Sheldrick, G., *Acta Cryst.* **2008**, *A64*, 112-122.
5. Anderson, C. B.; Elliott, A. B. S.; Lewis, J. E. M.; McAdam, C. J.; Gordon, K. C.; Crowley, J. D., *Dalton Trans.* **2012**, *41*, 14625-14632.
